# **Title: Effects of CEPA and 1-MCP on flower bud differentiation of apple cv. ‘Nagafu No.2’ grafted on different rootstocks**

**Highlight: CEPA was more susceptible to easy-flowering rootstock**

**Wenfang Li<sup>1</sup>, Juan Mao<sup>1</sup>, Xinwen Li<sup>1</sup>, Jing Su<sup>1</sup>, Mohammed Mujitaba Dawuda<sup>1,2</sup>, Zonghuan Ma<sup>1</sup>, Cunwu Zuo<sup>1</sup>, Zeshan An<sup>1</sup>, Baihong Chen<sup>1,\*</sup>**

<sup>1</sup> College of Horticulture, Gansu Agricultural University, Lanzhou 730070, PR China

<sup>2</sup> Department of Horticulture, FoA, University for Development Studies, P. O. Box TL 1882, Tamale, Ghana

\* Correspondence: bhch@gsau.edu.cn

**Abstract** The apple (*Malus domestica* Borkh.) has a relatively long juvenile period which prevent the fruit breeding. The understanding of the flowering system is important to improve breeding efficiency in the apple. In this context, 2-year-old “Fuji” apple cv. “Nagafu No.2” trees that were grafted on dwarf self-rooted rootstock M.26, vigorous rootstock *M. sieversii* and interstock M.26/*M. sieversii*, respectively. Spraying with clean water (as controls), 800 mg·L<sup>-1</sup> 2-Chloroethylphosphonic acid (CEPA) and 2 μL·L<sup>-1</sup> 1-methylcyclopropene (1-MCP). The results showed that CEPA significantly repressed the vegetative growth attributed to the increase of the ABA and ZT synthesis, and the decrease of IAA synthesis in leaves and buds. However, there was no significant difference or significant inverse effect between 1-MCP and control. Furthermore, CEPA promoted flower formation, increased the flowering rate and advanced the blossom period for 2 days compared with the control, which accompanied by the accumulation of soluble sugar, glucose and sucrose, and the increase of α-amylase (α-AMY) and sucrose phosphate synthase (SPS) activities, and the decrease of the starch contents and sucrose synthase (SS) activities in leaves and buds. However, the blossom period was delayed for 2 days after spraying with 1-MCP. Finally, the expression of *TFL1* was significantly repressed while the *API* was significantly promoted in buds from M.26 and M.26/*M. sieversii* after spraying with CEPA, while the effect was not significant from *M. sieversii*. However, the expression

levels of *TFL1* and *API* were not significantly different from the control after the application of 1-MCP. In spite of this, CEPA was more susceptible to easy-flowering M26, followed by M26/*M. sieversii*, and still less susceptible to difficult-flowering rootstock *M. sieversii*.

**Keywords:** Apple, CEPA, 1-MCP, flower bud differentiation, carbohydrate, hormone, scion-stock combinations.

**Abbreviations:** 1-MCP, 1-methylcyclopropene;  $\alpha$ -amylase ( $\alpha$ -AMY); ABA, abscisic acid; CEPA, 2-Chloroethylphosphonic acid; CTK, cytokinins; ETH, ethylene; GA, gibberellin; SPS, sucrose phosphate synthase; SS, sucrose synthase; ZT, zeatin.

## Introduction

The cultivated apple (*Malus domestica* Borkh.) is one of the commercially important fruit crops in the world and has a relatively long juvenile growth period, which disturbs early cropping and fruit breeding (Dennis *et al.*, 2003; Mimida *et al.*, 2012). Moreover, it takes from 14 to 16 months for a reproductive period between the flower initiation and the mature fruit in the apple (Mimida *et al.*, 2011). The flower initiation occurred in the early summer of the previous year affects directly the yield of apple crops in the autumn of the following year. Apple cv. ‘Nagafu No.2’ is a good case in point. Therefore, the understanding of the flowering system is important to improve breeding efficiency and maintain a steady harvest in the apple.

Rootstock effects on apple scions with different growth habits and gene expression patterns (Jensen *et al.*, 2003; Tworkoski and Miller, 2007). Interstock bridge grafting of mature apple trees maybe a viable method of reducing vegetative growth with increased reproductive growth and improving yield (Samad *et al.*, 1998). Dwarfing root-stock would decrease branch angles, inhibit stem elongation more inupright than in wide angled trees which makes it more convenient to manage and increase productivity (Tworkoski and Miller, 2007). However, interstock bridge grafting should be selected in the areas without irrigation conditions, and both the interstock and the self-rooted rootstock can be used in areas with irrigation conditions (Zhang *et al.*, 2016). The common rootstock used in dwarfing cultivation is M, MM, P, B and and SH (Tworkoski and Miller, 2007; Gjamovski and Kiprijanovski, 2011). However, ‘Fuji’ apple is still more difficult to be flowering than other apple cultivars even if

67 grafted on the dwarfing root-stock.

68 The level of sugar metabolism in the organs of the fruit trees has a great influence  
69 on the flower bud differentiation. Studies have shown that the metabolism, transport  
70 and accumulation of carbohydrates are significantly related to flower bud  
71 differentiation in fruit trees (Green *et al.*, 1993; Ito *et al.*, 2002; Eshghi *et al.*, 2007).  
72 Furthermore, flower bud differentiation is also influenced by the type and content of  
73 plant endogenous hormones in fruit trees (Porri *et al.*, 2012, Li *et al.*, 2016).  
74 Phytohormones play important roles in flower bud differentiation (Kong *et al.*, 2009;  
75 Li *et al.*, 2016). Moreover, most of the genes regulating flower development have  
76 been found, mainly represented by *FLOWERING LOCUST (FT)*, *TERMINAL*  
77 *FLOWER1 (TFL1)*, *LEAFY (LFY)*, *APETALA1 (API)*, *CONSTANS (CO)* and  
78 *EMBRYONIC FLOWER (EMF)* (Moon *et al.*, 2003; Wang *et al.*, 2007; Kotoda *et al.*,  
79 2010; Sadao and Masato, 2012; Haberman *et al.*, 2016; Patil *et al.*, 2017). In apple,  
80 the counterparts of the floral genes including *MdFT*, *MdTFL1*, and *MdAPI*, had been  
81 isolated and characterized (Hättasch *et al.*, 2008; Flachowsky *et al.*, 2009; Kotoda *et al.*  
82 *et al.*, 2010; Zhang *et al.*, 2016).

83 The temperate deciduous tree apple, flowers autonomously, with floral initiation  
84 dependent on aspects of vegetative development in the growing season before  
85 anthesis (Lee and Safe, 2008). Delay in flowering is one of the major limitations in  
86 the production of “Fuji” apple (Fan *et al.*, 2017). Ethephon (2-Chloroethylphosphonic  
87 acid, CEPA) is an ethylene (ETH) yielding chemical, when applied directly to plants,  
88 can elicit a response characteristic of ETH treatment (Yang, 1969; Cools *et al.*, 2011).  
89 1-Methylcyclopropene (1-MCP) is an anti-ETH compound due to its ability to block  
90 the ETH binding sites in plant cells (Prange and DeLong, 2003; Prange *et al.*, 2005).  
91 Hormones such as indole-3-acetic acid (IAA), cytokinins (CTK), abscisic acid (ABA)  
92 and gibberellic acid (GA), play important roles in the flower bud induction of fruit  
93 trees (Dieleman *et al.*, 1998; Porri *et al.* 2012, Li *et al.* 2016). Nevertheless, the effect  
94 of exogenous ETH and its inhibitor 1-MCP on flower bud differentiation in fruit trees  
95 was rarely reported. In the present research, 2-year-old “Fuji” apple cv. “Nagafu  
96 No.2” was grafted on dwarf self-rooted rootstock M.26, vigorous rootstock *M.*  
97 *sieversii* and interstock M.26/*M. sieversii*, respectively. CEPA and 1-MCP were used  
98 to compare the physiological and biochemical differences among scion-stock  
99 combinations. The effect of CEPA and 1-MCP on the flower bud differentiation of

apple from scion-stock combinations interactions with vegetative growth, carbohydrates, and plant endogenous hormones, are discussed, in order to provide a theoretical basis for solving the problems of late flowering and explore the regulation mechanism of plant growth regulators on flower bud differentiation in fruit trees.

## Materials and methods

### *Plant materials, growth conditions and treatments*

Experiments were conducted in 2016 and 2017, using 2-year-old Fuji apple cv. ‘Nagafu No.2’ trees that were grafted on dwarf self-rooted rootstock M.26, vigorous rootstock *M. sieversii* and interstock M.26/*M. sieversii* as research materials. Trees were planted in the Apple Demonstration Nursery in Qingcheng county, Gansu Province of China (36°14N, 107°88E). The plants were at 1.5 × 4.0 m row and plant spacing for both dwarf self-rooted rootstock and interstock, 3.0 × 5.0 m for vigorous rootstock which were managed using standard horticultural practices. Spraying clean water on July 1<sup>st</sup>, 2016 until dripping on the branches on the whole trees of scion-stock combinations including Nagafu No.2/M.26, Nagafu No.2/*M. sieversii* and Nagafu No.2/M.26/*M. sieversii* as controls, were named as CK1, CK2 and CK3, respectively. Additionally, spraying scion-stock combinations with 800 mg·L<sup>-1</sup> CEPA and 2 μL·L<sup>-1</sup> 1-MCP as treatments, were named as A1, A2, A3 and B1, B2, B3, respectively. Furthermore, the entire tree with a black plastic bag for 24 hours after spraying. The flower bud morphology was measured twice at 16 days (17<sup>th</sup> July, 2016) and 31 days (2<sup>nd</sup> August, 2016) after spraying treatments. The physiological and biochemical indicators including sugar content, enzyme activity and hormone content were measured three times, at 1 day (2<sup>nd</sup> July, 2016), 16 days and 31 days after spraying treatments. Samples for RNA extraction were collected once at 16 days after spraying treatments. Samples (buds and their surrounding leaves) for measuring physiological and biochemical indicators or RNA extraction were immediately frozen in liquid nitrogen and stored at -80 °C. Each treatment was subdivided into three subgroups consisting of 30 trees each to allow for 3 replications. Flowering rates were calculated during the blossom period, 298 days after spraying (April 28, 2017).

### *Measurement of growth indicators*

The length of terminal shoots (above the interface) and new shoots was measured by

133 tape measure. The stem diameter (10 cm above the interface) was measured with a  
134 vernier caliper. Dry and fresh weight of leaves was measured by electronic balance.  
135 The increment of these growth indicators comes from 31 days to 1 day.

136

#### 137 *Scanning electron microscopy*

138 Fifteen fresh flower buds which were uniform in size and vigor were collected. The  
139 samples were fixed and stored in serum bottles containing 10 mL of 2.5%  
140 glutaraldehyde fixative and placed in a vacuum pump for 30 min. Twelve flower buds  
141 were selected and rinsed three times (10 min each) in 0.1 mol·L<sup>-1</sup> phosphate buffer  
142 and were kept in 50% ethanol during dissection to prevent desiccation. Later, the  
143 samples were dehydrated in ethanol series (one time 30%, 50%, 70%, 80% and 90%  
144 for 30 min and then three times in 100% for 15 min). And then dehydrated with  
145 tert-butyl alcohol instead of ethanol, and the dehydration process cannot be reversed.  
146 After 3 h of air-drying, peeling flower bud, part of calyx and hair flake under stereo  
147 microscop. These samples were glued to the stage one by one with conductive  
148 adhesive, which were coated with palladium-gold in a sputter coater (S150B; Edwards)  
149 for about 1 min, were examined by scanning electron microscope (S-3400N; Hitachi)  
150 at an acceleration voltage of 10 kV.

151

#### 152 *Starch and sugars content measurements*

153 Starch content was measured by acid hydrolysis method given by McCredy *et al.*  
154 (1950). To the residue, 5mL of distilled water and 6.5 mL of 52% perchloric acid was  
155 added to extract the starch by placing the samples at 0 °C for 20 min. The mixture was  
156 centrifuged and retained the extract. The process was repeated 3-4 times using fresh  
157 perchloric acid and diluted to final volume 100 mL. To 0.5 mL of diluted extract, 4.5  
158 mL of distilled water was added followed by addition of 10 mL of cold anthrone  
159 sulfuric acid reagent in ice bath. The sample mixture was heated at 100 °C for 8 min,  
160 and cooled rapidly to room temperature. The absorbance was measured at 630 nm.  
161 The final content of starch was calculated from a standard curve plotted with known  
162 concentration of glucose.

163 Soluble sugars were determined Spectrophotometrically by anthrone reagent using  
164 glucose as standard at 625 nm (Dubois *et al.*, 1956). Approximately 0.2 g of frozen  
165 bud and leaf samples were used to measure the content of glucose and sucrose by kit

166 from Suzhou Comin Biotechnology Co., Ltd (Suzhou, China) according to the  
167 instructions. They were finally assayed from the obtained light absorption value at  
168 480 nm.

169

#### 170 *Enzyme activity measurements*

171 Activity of  $\alpha$ -amylase ( $\alpha$ -AMY) was assayed by the method of Shuster and Gifford  
172 (1962). Approximately 0.5 g of frozen bud and leaf samples were  
173 homogenized in ice cold extraction buffer (0.1 M phosphate buffer pH 7.0),  
174 centrifuged at 10,000 rpm (4 °C) and the supernatant treated as enzyme extract. One  
175 mL of starch substrate was added to 0.5 mL of enzyme extract. 0.2 mL of aliquot was  
176 removed from this and added 3 mL of KI. The absorbance was recorded at 620 nm.  
177 Then, the reaction mixture left was incubated at 25 °C, and then removed the aliquot  
178 and repeated the color developing process (violet blue) after every 30 min. Blank was  
179 run simultaneously without having substrate. In control the enzyme extract was  
180 substituted with 0.5 mL of distilled water.

181 Approximately 0.1 g of frozen bud and leaf samples were used to measure sucrose  
182 synthase (SS) and sucrose phosphate synthase (SPS) activities by enzyme activity kit  
183 from Suzhou Comin Biotechnology Co., Ltd (Suzhou, China). The 1 mL extract was  
184 added for grinding, centrifuged at 8,000 g for 10 min (4 °C). The supernatant was  
185 placed on the ice to be measured, and then follow the instructions. SS and SPS  
186 activities were assayed from the obtained light absorption value at 480 nm.

187

#### 188 *Hormone measurements*

189 Approximately 0.5 g of frozen bud and leaf samples were used to measure IAA, ABA  
190 and zeatin (ZT). Each sample was then combined with 10 mL of 80%  
191 chromatographic pure methanol (preparation with DNase/RNase-free double-distilled  
192 water). Each sample was washed thrice with solvent, transferred into a test tube, and  
193 stored in a refrigerator at 4 °C overnight in the dark. Then, the samples were  
194 centrifuged for 20 min under refrigerated conditions at 4 °C. Supernatant fluid was  
195 transferred into a new centrifuge tube. The extract was concentrated, and the methanol  
196 was volatilized under 40 °C by rotary evaporation to obtain 2 mL of concentrate. The  
197 evaporation bottle wall was then washed continuously with 50% methanol, and the  
198 volume was raised to 10 mL with 50% chromatographic pure methanol. The fluid for

199 testing was filtered through 0.22  $\mu$ m organic membrane. This fluid was then  
200 transferred to a 2 mL centrifuge tube and placed in an ice box. The hormone contents  
201 from the treatments were identified in the Instrumental Researches and Analysis  
202 Center of Gansu Agricultural University.

203 The determination method was performed with different concentrations of IAA,  
204 ABA, and ZT, standard samples, which were used to construct a standard curve. The  
205 standard samples were purchased from Sigma Company, and the external standard  
206 curve and quantitative methods were performed for the measurements. The type of  
207 LC-MS apparatus used was the Agilent 1100 series (Agilent Technologies,  
208 Waldbronn, United States). The detector was vwd, and the chromatographic column  
209 was Extend-C18 (4.6 mm  $\times$  250 mm, 5  $\mu$ m). The mobile phase was chromatographic  
210 methanol and 0.6% iced acetic acid previously subjected to ultrasonication (0 min,  
211 methanol:acetic acid = 40:60; 11.9 min, methanol:acetic acid = 40:60; 12 min,  
212 methanol:acetic acid = 50:50). The flow velocity was 1.0 mL/min, the wavelength  
213 was 254 nm, and the column temperature was 25  $^{\circ}$ C.

214

#### 215 *RNA extraction and cDNA synthesis*

216 The RNA plant reagent (Real-Times Biotechnology, Beijing, China) was used to  
217 extract floral bud total RNA. RNase-free DNase I (Takara, Dalian, China) was used to  
218 purify RNA. During RNA purification, DNase digestions were performed three times.  
219 1% (w/v) agarose gel analysis was used to assess RNA quality. Quantification of RNA  
220 was performed using the absorbance at 260 nm. After that, quantified RNA was  
221 reverse transcribed into cDNA using the Super-Script First-Strand Synthesis system  
222 (Invitrogen, Carlsbad, CA).

223

#### 224 *Gene expression analysis by qRT-PCR*

225 Genes including terminal flower 1-like (*TFL1*) and apetala 1-like (*API*) were chosen  
226 for validation using qRT-PCR. *MdGADPH* was used as internal reference. Primers for  
227 qRT-PCR, which were designed with Primer 5.0 software, are shown in Table S1.  
228 qRT-PCR reactions were analyzed in ABI StepOne <sup>TM</sup> Plus Real-Time PCR System  
229 with SYBR Green PCR Master Mix (Takara, Dalian, China), and amplified with 1  $\mu$ L  
230 of cDNA template, 10  $\mu$ L of 2  $\times$  SYBR Green Master Mix, and 1  $\mu$ L of each primer,  
231 to a final volume of 20  $\mu$ L by adding water. Amplification program consisted of one

232 cycle of 95 °C for 30 s, 40 cycles of 95 °C for 5 s, and 60 °C for 34 s, followed by one  
233 cycle of 95 °C for 15 s, 60 °C for 60 s, and 95 °C for 15 s. Fluorescent products were  
234 detected in the last step of each cycle. Melting curve analysis was performed at the  
235 end of 40 cycles to ensure proper amplification of target fragments. All qRT-PCR for  
236 each gene was performed in three biological replicates, with three technical repeats  
237 per experiment. Relative gene expression was normalized by comparing with CK  
238 expression and analyzed using comparative  $2^{-\Delta\Delta C_T}$  Method (Livak and Schmittgen,  
239 2001). The results of gene expression were visualized by histogram and heatmap.

240

#### 241 *Statistical analysis*

242 Data on growth, physiological parameters and expression levels of the flowering  
243 genes in the buds and leaves of ‘Nagafu No.2’ were analyzed by one-way analyses of  
244 variance and means separated by Duncan multiple range test at  $P < 0.05$  using SPSS  
245 software, version 21.0 (SPSS, Chicago, IL, USA). Figures were prepared using Origin  
246 9.0 (Microcal Software Inc., Northampton, MA, USA).

247

## 248 **Results**

### 249 *Effects of CEPA and 1-MCP on the growth parameters of apple from scion-stock* 250 *combinations*

251 After 31 days of spraying CEPA, the increment of terminal shoot length and new  
252 shoot length from A1, A2 and A3 was significantly lower than those of CK1, CK2 and  
253 CK3, respectively (Table 1). After 31 days of spraying 1-MCP, the increment of  
254 terminal shoot length and new shoot length of B1, B2 and B3 were not significantly  
255 different from those of CK1, CK2 and CK3, respectively, except that the increment of  
256 terminal shoot length of B1 was significantly higher than that of CK1. However, there  
257 is no significant difference in the increment of new shoot diameter between the  
258 different treatments from the same rootstock. Furthermore, the overall trend of the  
259 three growth parameters from the three different scion-stock combinations under the  
260 same treatment was the vigorous rootstock *M. sieversii*, followed by the interstock  
261 M.26/*M. sieversii*, and finally the dwarf self-rooted rootstock M.26.

262

263

264

265 **Table 1. Effects of CEPA and 1-MCP on growth parameters of apple cv. 'Nagafu No.2'**

|     | Increment of terminal shoot length (cm) | Increment of diameter of new shoot (mm) | Increment of new shoot length (cm) |
|-----|-----------------------------------------|-----------------------------------------|------------------------------------|
| A1  | 16±0.65e                                | 2.93±0.19b                              | 6.02±0.24d                         |
| B1  | 24±0.83c                                | 2.91±0.15b                              | 8.14±0.78bc                        |
| CK1 | 22±0.69d                                | 2.87±0.07b                              | 7.80±0.49c                         |
| A2  | 22±0.43d                                | 3.92±0.33a                              | 8.72±0.61bc                        |
| B2  | 29±0.97a                                | 3.83±0.31a                              | 13.36±0.96a                        |
| CK2 | 28±0.86a                                | 3.85±0.13a                              | 11.83±1.18a                        |
| A3  | 21±0.93d                                | 3.01±0.35b                              | 6.46±0.63d                         |
| B3  | 25±0.87b                                | 3.84±0.30a                              | 9.08±0.37b                         |
| CK3 | 25±0.11b                                | 3.53±0.24ab                             | 8.89±0.44b                         |

266 Note: Different small letters indicate significant difference at 0.05 levels.

267

268 *Effects of CEPA and 1-MCP on the bud morphology of apple from scion-stock*  
269 *combinations*

270 On the 16th day after spraying CEPA, the central protruding part of the growth point  
271 from A1, A2 and A3 was significantly changed compared with CK1, CK2 and CK3,  
272 respectively (Fig. 1A). However, the growth points of B1, B2 and B3 were not  
273 significantly different from those of CK1, CK2 and CK3, respectively.

274 After 31 days of spraying with CEPA, A1, A2 and A3 were differentiated into  
275 stamen primordia within two adjacent petal primordia, forming 5 protrusions, that is,  
276 the pistil primordium (Fig. 1B). Meanwhile, the development of the primitive lateral  
277 flower bud begins with the differentiation of 2 stipules primordia from both sides of  
278 the original lateral flower bud, and then 5 sepal primordia were gradually carried out,  
279 forming the lateral flower bud in the same order as the central flower bud. There were  
280 significant differences in flower bud morphological changes compared to CK1, CK2  
281 and CK3, respectively. In addition, after spraying with 1-MCP, the lateral flowering  
282 primordium of B2 appeared, and entered the late stage of flower bud differentiation,  
283 which was significantly different from the CK2. The growth cone of CK2 was further  
284 uplifted and the sepal primordium was formed in the periphery. The growth cone of  
285 B3 was further uplift, formed in the periphery of 5 sepals primordia, and the  
286 difference was significant with that of CK3.

287

288 *Effects of CEPA and 1-MCP on flowering rate of apple from scion-stock combinations*

289 According to the survey on flowering of 'Nagafu No.2' in 2017, the average

flowering rate per tree of A1 and A3 were significantly higher than CK1 and CK3, respectively (Fig. 2). Whereas the flowering rates of B1 and B3 were significantly less than CK1 and CK3, respectively. However, the flowering rates of A2 was close to 0, both B2 and CK2 were 0. CK1 and CK3 reached the full flowering stage on May 1<sup>st</sup>. Both A1 and A3 reached full flowering on April 28<sup>th</sup>, and all the calluses were fully expanded. Blossom of B1 and B3 was delayed, and flower buds did not fully expand on April 28<sup>th</sup> until May 3<sup>rd</sup>. In addition, the overall order of flowering rate of the three different scion-stock combinations was the dwarf self-rooted rootstock M.26, followed by the interstock M.26/*M. sieversii*, and finally the vigorous rootstock *M. sieversii*.

300

### 301 *Effects of CEPA and 1-MCP on starch and sugars content in buds and leaves of apple* 302 *from scion-stock combinations*

303 The starch contents in buds and leaves of all treatments were decreased slightly at 31  
304 days after spraying compared with 16 days. There was no significant difference in  
305 starch content from buds and leaves a day after spraying treatments from the same  
306 scion-stock combination (Fig. 3A, B). The starch contents were significantly lower in  
307 A1, A2 and A3 than those of CK1, CK2 and CK3 in buds and leaves from the 16 and  
308 31 days after spraying, respectively. On the contrary, the starch contents in buds and  
309 leaves of B1, B2 and B3 were significantly higher than those of CK1, CK2 and CK3  
310 or no significant difference, respectively. The contents of soluble sugar, glucose and  
311 sucrose in buds and leaves increased first and then decreased slightly from day 1 to 31  
312 after spraying treatments, and there was no significant difference a day after spraying  
313 treatments from the same scion-stock combination (Fig. 3C–H). Furthermore, the  
314 contents of soluble sugar, glucose and sucrose were significantly higher in buds and  
315 leaves of A1, A2 and A3 than those of CK1, CK2 and CK3 from 16 and 31 days after  
316 spraying, respectively. However, they were significantly lower in B1, B2, B3 than in  
317 CK1, CK2 and CK3 or no significant difference, respectively. Additionally, the  
318 overall trend of the contents of soluble sugar, glucose and sucrose in buds and leaves  
319 of the three scion-stock combinations under the same treatment was dwarf self-rooted  
320 rootstock M.26, followed by the interstock M.26/*M. sieversii*, and finally the vigorous  
321 rootstock *M. sieversii*. On the contrary, the starch content showed the opposite trend.

322

323 *Effects of CEPA and 1-MCP on activities of enzymes related to sugar metabolism in*  
324 *buds and leaves of apple from scion-stock combinations*

325 There was no significant difference in activities of  $\alpha$ -AMY from buds and leaves a  
326 day after spraying treatments from the same scion-stock combination. In addition, the  
327 activities of  $\alpha$ -AMY in buds and leaves of A1, A2 and A3 from 16 and 31 days were  
328 significantly higher than those of CK1, CK2 and CK3, respectively (Fig. 4A, B).  
329 However, they were significantly lower in buds and leaves of B1, B2 and B3 than  
330 those of CK1, CK2, CK3 or no significant difference, respectively. The activities of  
331 SS also were not significantly different in buds and leaves a day after spraying  
332 treatments from the same scion-stock combination, but significantly lower in A1, A2  
333 and A3 from 16 and 31 days after spraying than those in CK1, CK2 and CK3,  
334 respectively (Fig. 4C, D). However, B1, B2 and B3 were significantly higher than  
335 those of CK1, CK2 and CK3 or no significant difference, respectively. Remarkably,  
336 SPS activity showed the opposite trend with SS activity (Fig. 4E, F). The activities of  
337  $\alpha$ -AMY, SS and SPS in buds and leaves of all treatments increased from day 1 to 31  
338 days. Further, the overall trend of  $\alpha$ -AMY, SS and SPS activity in buds and leaves of  
339 the three scion-stock combinations under the same treatment also was dwarf  
340 self-rooted rootstock M.26, followed by the interstock M.26/*M. sieversii*, and finally  
341 the vigorous rootstock *M. sieversii*.

342  
343 *Effects of CEPA and 1-MCP on hormones content in buds and leaves of apple from*  
344 *scion-stock combinations*

345 Except that there was no significant difference a day after spraying treatments from  
346 the same scion-stock combination, the contents of ABA and ZT in buds and leaves of  
347 A1, A2 and A3 from 16 and 31 days after spraying were significantly higher than  
348 those of CK1, CK2 and CK3, whereas B1, B2 and B3 were significantly lower, or no  
349 significant difference, respectively (Fig. 5A-D). The contents of IAA also were  
350 non-significant a day after spraying treatments from the scion-stock combination.  
351 Furthermore, the contents of IAA in buds and leaves of B1, B2 and B3 from 16 and  
352 31 days after spraying were significantly higher than those of CK1, CK2 and CK3,  
353 whereas A1, A2 and A3 were significantly lower, respectively (Fig. 5E, F). Moreover,  
354 the contents of ABA, ZT and IAA in buds and leaves of all treatments increased from  
355 day 1 to 31 days. Besides, the overall trend of endogenous hormone contents in buds

and leaves of the three scion-stock combinations under the same treatment also was dwarf self-rooted rootstock M.26, followed by the interstock M.26/*M. sieversii*, and finally the vigorous rootstock *M. sieversii*.

#### *Effects of CEPA and 1-MCP on the flowering genes expression level in buds and leaves of apple from scion-stock combinations*

After 16 days of spraying with CEPA, the expression level of the floral negative regulator gene *TFL1* was significantly down-regulated, and the floral positive regulator gene *API* was significantly up-regulated in buds of dwarf self-rooted rootstock M.26 and the interstock M.26/*M. sieversii* compared with the control, whereas the effect on the vigorous rootstock *M. sieversii* was not significant (Fig. 6). Furthermore, there was no significant difference in leaves. However, the expression levels of *TFL1* and *API* were not significantly different from the control after the application of 1-MCP.

## **Discussion**

*CEPA promoted flower induction mainly by promoting the accumulation of carbohydrates, ABA and ZT*

Ramirez and Hoad (1981) suggested that CEPA could inhibit growth and promote flower, probably due to CEPA inhibited the biosynthesis and operation of IAA and GA in shoots. The result of flower bud morphology in this study showed that flower bud differentiation of apple cv. ‘Nagafu No.2’ was promoted at 16 days and 31 days after spraying with CEPA compared with the control, while the effect of 1-MCP on flower bud differentiation was not significant (Fig. 1A, B). The flowering rate also was significantly increased and the blossom period was 2 days ahead of time compared with the control after spraying with CEPA, whereas the flowering rate was significantly decreased and the blossom period was delayed for 2 days after spraying with 1-MCP. Accordingly, the content of carbohydrates from buds have a significant positive impact on the flower bud formation in fruit trees (Garcia-Lui *et al.*, 1995; Shalom *et al.*, 2014). Wünsche *et al.* (2005) showed that the content of various monosaccharides and starch in leaves and terminal buds from 7-year-old apple cv. “Braeburn/M26” changed significantly with the passage of time. Xing *et al.* (2014) found that the accumulation of sucrose, glucose, fructose and soluble sugars during

flower induction can promote flower bud differentiation as an energy substance in buds and leaves of “Fuji” apple. In the current work, the starch contents in buds and leaves from A1, A2 and A3 were significantly decreased at 16 days and 31 days after spraying with CEPA, whereas slightly increased from B1, B2 and B3 after the 1-MCP application in contrast to those of CK1, CK2 and CK3, respectively (Fig. 3A, B). Otherwise, the contents of soluble sugar, glucose and sucrose were significantly promoted at 16 days and 31 days after spraying with CEPA, and slightly inhibited after the 1-MCP application (Fig. 3C-H). Suggesting that CEPA can promote the synthesis and accumulation of soluble sugar, glucose and sucrose in buds and leaves of apple cv. ‘Nagafu No.2’, but inhibit the synthesis and accumulation of starch, therefore, promote flower bud induction as an energy substance. Meanwhile, the activities of  $\alpha$ -AMY and SPS also were increased at 16 days and 31 days after spraying with CEPA, and slightly decreased after the 1-MCP application, which were contrary to the activities of SS in buds and leaves of apple cv. ‘Nagafu No.2’ (Fig. 4A-F). These results were consistent with previous studies that the starch content decrease was accompanied by a small increase in the  $\alpha$ -AMY activity (Lambrechts *et al.*, 1994), an SPS activity negatively related with starch content in leaves but did not inhibit normal plant growth (Hashida *et al.*, 2016), and there was a highly significant negative correlation observed between the SS activity and sucrose content in the florets and branchlets of broccoli (*Brassica oleracea* L.) (Pramanik *et al.*, 2004).

Researchers have done a lot of research on the regulation of GA on flower bud differentiation in fruit trees (Xing *et al.*, 2014; Yamaguchi *et al.*, 2014). Apart from GA, several other hormones such as ABA, auxin, CTK and ETH are closely related to flower bud differentiation (Bangerth, 2008; Grochowska and Hodun, 2012). In the present research, the increment of terminal shoot length and new shoot length was significantly inhibited after spraying with CEPA, whereas slightly promoted or no significant difference after spraying with 1-MCP (Table 1). Simultaneously, the contents of ABA and ZT were increased, while IAA was decreased after spraying with CEPA, which contrary to 1-MCP (Fig. 5A-F). This is mainly because 1-MCP strongly competes with ETH receptors after spraying 1-MCP and binds to ETH receptors through metal atoms, thus blocking the normal binding of ETH to its receptors. Consequently, we concluded that the application of exogenous CEPA promoted flower bud differentiation by promoting the synthesis and accumulation of ABA and ZT and

422 inhibiting the accumulation of IAA, thereby suppressing vegetative growth and  
423 promoting reproductive growth.

424

425 *CEPA was more susceptible to easy-flowering rootstock and still less susceptible to*  
426 *difficult-flowering rootstock*

427 Growth of the scion was affected by the genotype of the rootstock (Dieleman *et al.*,  
428 1998; Gonçalves *et al.*, 2006). According to Richards *et al.* (1986), the content of GA  
429 in leaves and branches from interstock of the dwarfing cultivar M9 decreased  
430 compared to the nondwarfing M115 interstock. Kamboj *et al.* (1999) showed that the  
431 contents of CTK in the branches and roots from the vigorous rootstock MM106 were  
432 higher than those from the dwarfing rootstocks, M26 and M9. Similarly, the overall  
433 trend of the increment of terminal shoot length, new shoot length and new shoot  
434 diameter from the three different scion-stock combinations under the same treatment  
435 in this study was the vigorous rootstock *M. sieversii*, followed by the interstock  
436 M.26/*M. sieversii*, and finally the dwarf self-rooted rootstock M.26. It was consistent  
437 with IAA content while contrary to the content of ABA and ZT (Fig. 5), thus  
438 conducive to vegetative growth and the flowering rate showed the opposite trend (Fig.  
439 2). The highest rate of flowering was from dwarf self-rooted rootstock M.26, followed  
440 by interstock M.26/*M. sieversii*, and finally the difficult-flowering rootstock, vigorous  
441 rootstock *M. sieversii*. Furthermore, after the application of CEPA and 1-MCP, the  
442 flowering rates of A1 and A3 were significantly increased in contrast to those of CK1  
443 and CK3, while those of B1 and B3 were significantly decreased, but no significant  
444 difference was found between A2, B2 and CK2.

445 Collectively, the application of CEPA and 1-MCP was more susceptible to  
446 easy-flowering rootstock dwarf self-rooted rootstock M.26, followed by interstock  
447 M.26/*M. sieversii*, and still less susceptible to difficult-flowering rootstock, vigorous  
448 rootstock *M. sieversii*.

449

450 *Flower bud induction is closely linked to flowering-related genes TFL1 and AP1 in*  
451 *buds and leaves of apple from scion-stock combinations*

452 Liljegren *et al.* (1999) reported that the normally sharp phase transition between the  
453 production of leaves with associated shoots and formation of the flowers in  
454 *Arabidopsis*, which occurs upon floral induction, is promoted by positive feedback

interactions between *LEAFY* (*LFY*) and *APETALA1* (*API*), together with negative interactions of these two genes with *TERMINAL FLOWER1* (*TFL1*). *TFL1* is a key negatively regulator of flowering time and the development of the inflorescence meristem in *Arabidopsis thaliana* (Hanano and Goto, 2011). In this study, the expression of *TFL1* was repressed while *API* was promoted in buds and leaves in contrast to the control after 16 days of spraying with CEPA (Fig. 6). However, the application of 1-MCP has the opposite effect. In concluded, the application of CEPA can up-regulate the expression of genes that are flowering positive regulators and down-regulate the expression of genes that are flowering negative regulators, resulting in the promotion of flower formation. In addition, there was no significant difference or significant inverse effect between 1-MCP and control compared with CEPA. This results are consistent with the findings that treatment with 1-MCP and ETH generally produced opposite effects on related genes (Yang *et al.*, 2016).

468

#### 469 **Acknowledgments**

This research was financially supported by the Fostering Foundation for the Excellent Ph.D. Dissertation of Gansu Agricultural University (2017002), and the Key Scientific Technology Research Projects of Gansu Province (GPCK2013-2).

#### **References**

**Bangerth PK.** 2008. Can regulatory mechanism in growth and development be elucidated through the study of endogenous hormone concentration? *Acta Horticulturae* **463**, 77–78.

**Cools K, Choje GA, Hammond JP, Thompson AJ.** 2011. Onion gene expression in response to ethylene and 1-MCP. *Plant Physiology*.

**Dennis FJ, Ferree DC, Warrington IJ.** 2003. Flowering, pollination and fruit set and development. In: Ferree DC, Warrington IJ (eds) *Apples: botany, production and uses*. CAB International, Oxon.

**Dieleman JA, Verstappen FWA, Kuiper D.** 1998. Bud break and cytokinin concentration in bleeding sap of *Rosa hybrida*, as affected by the genotype of the rootstock. *Journal of Plant Physiology* **152**(4–5), 468–472.

**Dubois M, Gilles KA, Hamilton JK, Rebers PA, Smith F.** 1956. Colorimetric method for determination of sugars and related substances. *Analytical Chemistry* **28**,

350–356.

**Eshghi S, Tafazoli E, Dokhani S, Rahemi M, Emam Y.** 2007. Changes in carbohydrate contents in shoot tips, leaves and roots of strawberry ( *Fragaria × ananassa*, Duch.) during flower-bud differentiation. *Scientia Horticulturae* **113(3)**, 255–260.

**Fan S, Zhang D, Gao C, Zhao M, Wu H, Li Y, Shen Y, Han M.** 2017. Identification, classification, and expression analysis of GRAS gene family in *Malus domestica*. *Front Physiology* **8**, 1–19.

**Flachowsky H, Hanke MV, Peil A, Strauss SH, Fladung M.** 2009. Overexpression of *LEAFY* in apple leads to a columnar phenotype with shorter internodes. *Planta* **231**, 251–263.

**Garcia-Luis A, Fornes F, Guardiola, JL.** 1995. Leaf carbohydrates and flower formation in Citrus. *Journal of the American Society for Horticultural Science* **120(2)**, 222–227.

**Gjamovski V, Kiprijanovski M.** 2011. Influence of nine dwarfing apple rootstocks on vigour and productivity of apple cultivar ‘Granny Smith’. *Scientia Horticulturae* **129(4)**, 742–746.

**Gonçalves B, Moutinho-Pereira J, Santos A, Silva AP, Bacelar E, Correia C, Rosa, E.** 2006. Scion-rootstock interaction affects the physiology and fruit quality of sweet cherry. *Tree Physiology* **26(1)**, 93–104.

**Green Berg J, Goldschmid T, Goren R.** 1993. Potential and limitation of the paclobutrazol in citrus orchards in Israel. *Acta Horticultural* **329**, 58–61.

**Grochowska MJ, Hodun M.** 2012. The dwarfing effect of single application of growth inhibitors to the root stem connection the--“collar tissue”-- of five species of fruit trees. *Journal of Pomology & Horticultural Science* **72**, 83–91.

**Hashida Y, Hirose T, Okamura M, Hibara KI, Ohsugi R, Aoki N.** 2016. A reduction of sucrose phosphate synthase (SPS) activity affects sucrose/starch ratio in leaves but does not inhibit normal plant growth in rice. *Plant Science* **253**, 40–49.

**Hättasch C, Flachowsky H, Kapturska D, Hanke M-V.** 2008. Isolation of flowering genes and seasonal changes in their transcript levels related to flower induction and initiation in apple (*Malus domestica*). *Tree Physiology* **28**, 1459–1466.

**Haberman A, Ackerman M, Crane O, Kelner JJ, Costes E, Samach A.** 2016. Different flowering response to various fruit loads in apple cultivars correlates with

degree of transcript reaccumulation of a TFL1-encoding gene. *Plant Journal* **87**(2), 161–173.

**Hanano S, Goto K.** 2011. *Arabidopsis TERMINAL FLOWER1* is involved in the regulation of flowering time and inflorescence development through transcriptional repression. *Plant Cell* **23**(9), 3172–3184.

**Ito A, Hayama H, Kashimura Y.** 2002. Sugar metabolism in buds during flower bud formation: a comparison of two Japanese pear [*Pyrus pyrifolia*, (Burm.) Nak.] cultivars possessing different flowering habits. *Scientia Horticulturae* **96**(1–4), 163–175.

**Jensen PJ, Rytter J, Detwiler EA, Travis JW, Mcnellis TW.** 2003. Rootstock effects on gene expression patterns in apple tree scions. *Plant Molecular Biology* **53**(4), 493–511.

**Kamboj J, Blake P, Quinlan J, Baker D.** 1999. Identification and quantitation by GC-MS of zeatin and zeatin riboside in xylem sap from rootstock and scion of grafted apple trees. *Plant Growth Regulation* **28**(3), 199–205.

**Kong L, Abrams SR, Owen SJ, Van NA, Von AP.** 2009. Dynamic changes in concentrations of auxin, cytokinin, ABA and selected metabolites in multiple genotypes of Douglas-fir (*Pseudotsuga menziesii*) during a growing season. *Tree Physiology* **29**(2), 183–190.

**Kotoda N, Hayashi H, Suzuki M, Igarashi M, Hatsuyama Y, Kidou S-I, Igasaki T, Nishiguchi M, Yano K, Shimizu T, Takahashi S, Iwanami H, Moriya S, Abe K.** 2010. Molecular characterization of *FLOWERING LOCUST*-like genes of apple (*Malus domestica* Borkh.). *Plant Cell Physiology* **51**, 561–575.

**Lambrechts H, Rook F, Kolloffel C.** 1994. Carbohydrate status of tulip bulbs during cold-induced flower stalk elongation and flowering. *Plant Physiology* **104**(2), 515–520.

**Lee J, Safe S.** 2008. Regulation of floral initiation in horticultural trees. *Journal of Experimental Botany* **59**(12), 3215–3228.

**Li YM, Zhang D, Xing LB, Zhang SW, Zhao CP, Han MY.** 2016. Effect of exogenous 6-benzylaminopurine (6-BA) on branch type, floral induction and initiation, and related gene expression in ‘Fuji’ apple (*Malus domestica* Borkh.). *Plant Growth Regulation* **79**, 65–70.

**Liljegren SJ, Gustafson-Brown C, Pinyopich A, Ditta GS, Yanofsky MF.** 1999.

Interactions among *APETALA1*, *LEAFY*, and *TERMINAL FLOWER1* specify meristem fate. *Plant Cell* **11**(6), 1007–1018.

**McCredy RM, Guggolz J, Silviera V, Owens HS.** 1950. Determination of starch and amylase in vegetables. *Analytical Chemistry* **22**, 1156–1158.

**Mimida N, Oshino H, Li J, Zhang C, Takagishi K, Yuki MT, Hiroshi I, Chikako H, Akira S, Sadao K, Masato W.** 2012. Effects of the plant growth regulators on expression of *MdTFL1* promoter fused  $\beta$ -glucuronidase (GUS) reporter gene in apple (*Malus* spp.) tissues in vitro. *Plant Tissue Culture Letters* **28**(5), 503–508.

**Mimida N, Ureshino A, Tanaka N, Shigeta N, Sato N, Moriya-Tanaka Y, Iwanami H, Honda C, Suzuki A, Komori S, Wada M.** 2011. Expression patterns of several floral genes during flower initiation in the apical buds of apple (*Malus × domestica*, Borkh. ) revealed by in situ hybridization. *Plant Cell Reports* **30**(8), 1485.

**Moon Y H, Chen L, Pan R L, Chang HS, Zhu T, Maffeo DM, Sung ZR.** 2003. *EMF* genes maintain vegetative development by repressing the flower program in Arabidopsis. *Plant Cell* **15**(3), 681–93.

**Patil HB, Chaurasia AK, Azeez A, Krishna B, Subramaniam VR, Sane AP, Sane PV.** 2017. Characterization of two *TERMINAL FLOWER1* homologs *PGTFL1* and *PGCENa* from pomegranate (*Punica granatum* L.). *Tree Physiology* **00**, 1-13.

**Porri A, Torti S, Romera-Branchat M, Coupland G.** 2012. Spatially distinct regulatory roles for gibberellins in the promotion of flowering of Arabidopsis under long photoperiods. *Development* **139**, 2198–2209.

**Pramanik BK, Matsui T, Suzuki H, Kosugi Y.** 2004. Changes in activities of sucrose synthase and sucrose phosphate synthase and sugar content during postharvest senescence in two broccoli cultivars. *Asian Journal of Plant Sciences* **(4)**, 398-402.

**Prange RK, Danielslake BJ, Jeong JC, Binns M.** 2005. Effects of ethylene and 1-Methylcyclopropene on potato tuber sprout control and fry color. *American Journal of Potato Research* **82**(2), 123–128.

**Prange RK, DeLong JM.** 2003. 1-Methylcyclopropene: The ‘magic bullet’ for horticultural products? *Chron Hort* **43**(1), 11–14.

**Ramirez H, Hoad GV.** 1981. Effects of growth substances on fruit-bud initiation in apple. *International Journal of Advanced Manufacturing Technology* **69**(9-12), 2111–2130.

**Richards D, Thompson WK, Pharis RP.** 1986. The influence of dwarfing

interstocks on the distribution and metabolism of xylem-applied [<sup>3</sup>H] gibberellin A<sub>4</sub> in apple. *Plant physiology* **82**(4), 1090–1095.

**Shalom L, Samuels S, Zur N, Shlizerman L, Doronfaigenboim A, Blumwald E, Sadka A.** 2014. Fruit load induces changes in global gene expression and in abscisic acid (ABA) and indole acetic acid (IAA) homeostasis in citrus buds. *Journal of Experimental Botany* **65**(12), 3029–3044.

**Samad A, Mcneil DL, Khan ZU.** 1999. Effect of interstock bridge grafting (M9 dwarfing rootstock and same cultivar cutting) on vegetative growth, reproductive growth and carbohydrate composition of mature apple trees. *Scientia Horticulturae* **79**(1–2), 23–38.

**Samuolienė G, Viškelienė A, Sirtautas R, Kviklys D.** 2016. Relationships between apple tree rootstock, crop-load, plant nutritional status and yield. *Scientia Horticulturae* **211**, 167–173.

**Shuster L, Gifford RH.** 1962. Changes in nucleotidases during the germination of wheat embryo. *Archives of Biochemistry and Biophysics* **96**, 532–540.

**Tworkoski T, Miller S.** 2007. Rootstock effect on growth of apple scions with different growth habits. *Scientia Horticulturae* **111**(4), 335–343.

**Wang H, Liu Y, Chong K, Liu BY, Ye HC, Li ZQ, Yan F, Li GF.** 2007. Earlier flowering induced by over-expression of *CO* gene does not accompany increase of artemisinin biosynthesis in *Artemisia annua*. *Plant Biology* **9**(3), 442–446.

**Wünsche JN, Greer DH, Laing WA, Palmer JW.** 2005. Physiological and biochemical leaf and tree responses to crop load in apple. *Tree physiology* **25**(10), 1253–1263.

**Xing L, Zhang D, Li Y, Zhao C, Zhang S, Shen Y, Han M.** 2014. Genome-wide identification of vegetative phase transition-associated micro RNAs and target predictions using degradome sequencing in *Malus hupehensis*. *BMC genomics* **15**(1), 1125.

**Yamaguchi N, Winter CM, Wu MF.** 2014. Gibberellin acts positively then negatively to control onset of flower formation in *Arabidopsis*. *Science* **344**(6184), 638–641.

**Yang SF.** 1969. Ethylene evolution from 2-chloroethylphosphonic acid. *Plant Physiology* **44**, 1203–1204.

**Yang X, Song J, Du L, Forney C, Campbell-Palmer L, Fillmore Sherry, Wismer**

**P, Zhang Z.** 2016. Ethylene and 1-MCP regulate major volatile biosynthetic pathways in apple fruit. *Food Chemistry* **194**, 325.

**Zhang D, Zhang B, Li W, Ma J, Tan M, Du J, Han M.** 2016. Characteristics of different scion-rootstock combinations on root development and distribution of apple sapling in the Weibei loess highlands. *Acta Horticulturae Sinica* **43** (4), 623–632.

**Zhang S, Zhang D, Fan S, Du L, Shen Y, Xing L, Li Y, Ma J, Han M.** 2016. Effect of exogenous GA3 and its inhibitor paclobutrazol on floral formation, endogenous hormones, and flowering-associated genes in ‘Fuji’ apple (*Malus domestica* Borkh.). *Plant Physiology & Biochemistry* **107**, 178–186.

### Figure legends

**Fig.1.** Changes of flower bud morphology from 3 scion-stock combinations including Nagafu No.2/M.26, Nagafu No.2/*M. sieversii* and Nagafu No.2/M.26/*M. sieversii* after exposure to 800 mg·L<sup>-1</sup> 2-Chloroethylphosphonic acid (CEPA) and 2 μL·L<sup>-1</sup> its inhibitor of 1-methylcyclopropene (1-MCP) after 16 days (a) and 31 days (b) under scanning electron microscope. Bars=100 μm.

**Fig. 2.** Effects of 800 mg·L<sup>-1</sup> 2-Chloroethylphosphonic acid (CEPA) and 2 μL·L<sup>-1</sup> its inhibitor of 1-methylcyclopropene (1-MCP) on flowering rate of ‘Nagafu No.2’. Bars indicate SE. Different small letters within the figures indicate significant difference at 0.05 levels.

**Fig. 3.** Changes of starch (a and b), soluble sugar (c and d), glucose (e and f) and sucrose (g and h) contents in buds and leaves of 3 scion-stock combinations including Nagafu No.2/M.26, Nagafu No.2/*M. sieversii* and Nagafu No.2/M.26/*M. sieversii* after exposure to 800 mg·L<sup>-1</sup> 2-Chloroethylphosphonic acid (CEPA) and 2 μL·L<sup>-1</sup> its inhibitor of 1-methylcyclopropene (1-MCP) after 1, 16 and 31 days. Bars indicate SE. Different small letters within the figures indicate significant difference at 0.05 levels.

**Fig. 4.** Changes of α-amylase (α-AMY) (a and b), sucrose synthase (SS) (c and d) and sucrose phosphate synthetase (SPS) (e and f) activity in buds and leaves of 3 scion-stock combinations including Nagafu No.2/M.26, Nagafu No.2/*M. sieversii* and

Nagafu No.2/M.26/M. *sieversii* after exposure to 800 mg·L<sup>-1</sup> 2-Chloroethylphosphonic acid (CEPA) and 2 μL·L<sup>-1</sup> its inhibitor of 1-methylcyclopropene (1-MCP) after 1, 16 and 31 days. Bars indicate SE. Different small letters within the figures indicate significant difference at 0.05 levels.

**Fig. 5.** Changes of endogenous ABA (a and b), ZT (c and d) and IAA (e and f) contents in buds and leaves of 3 scion-stock combinations including Nagafu No.2/M.26, Nagafu No.2/M. *sieversii* and Nagafu No.2/M.26/M. *sieversii* after exposure to 800 mg·L<sup>-1</sup> 2-Chloroethylphosphonic acid (CEPA) and 2 μL·L<sup>-1</sup> its inhibitor of 1-methylcyclopropene (1-MCP) after 1, 16 and 31 days. Bars indicate SE. Different small letters within the figures indicate significant difference at 0.05 levels.

**Fig. 6.** Changes of the relative expression levels of 2 flowering-related genes *TFL1* and *API* from leaves (a) and buds (b) of 3 scion-stock combinations including Nagafu No.2/M.26, Nagafu No.2/M. *sieversii* and Nagafu No.2/M.26/M. *sieversii* after exposure to 800 mg·L<sup>-1</sup> 2-Chloroethylphosphonic acid (CEPA) and 2 μL·L<sup>-1</sup> its inhibitor of 1-methylcyclopropene (1-MCP) after 16 days. The left y-axis indicates relative gene expression levels were determined by qRT-PCR and analyzed using 2<sup>-ΔΔC<sub>T</sub></sup> Method. All qRT-PCR for each gene used three biological replicates, with three technical replicates per experiments; error bars indicate SE. Different lower case letter indicates the significant difference among four treatments at *P* = 0.05.

**a**

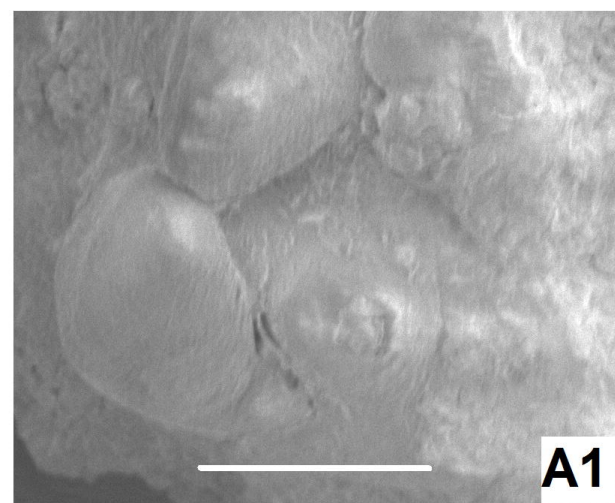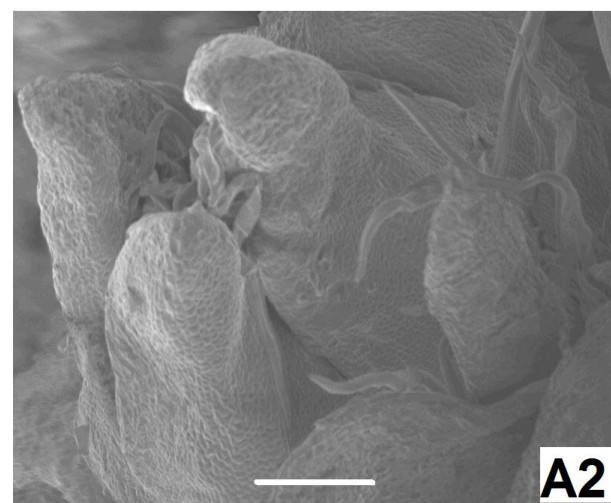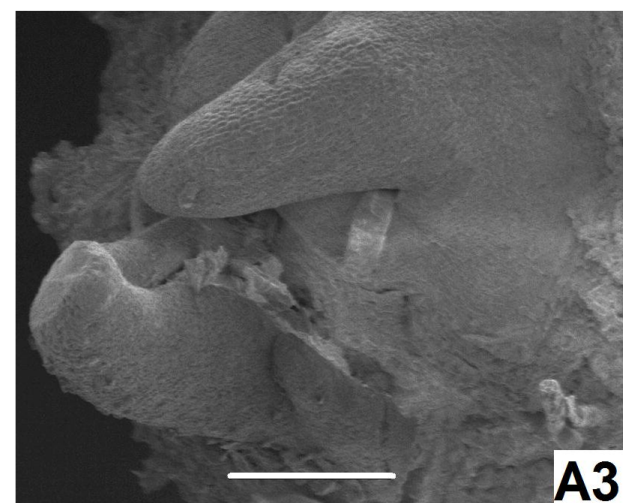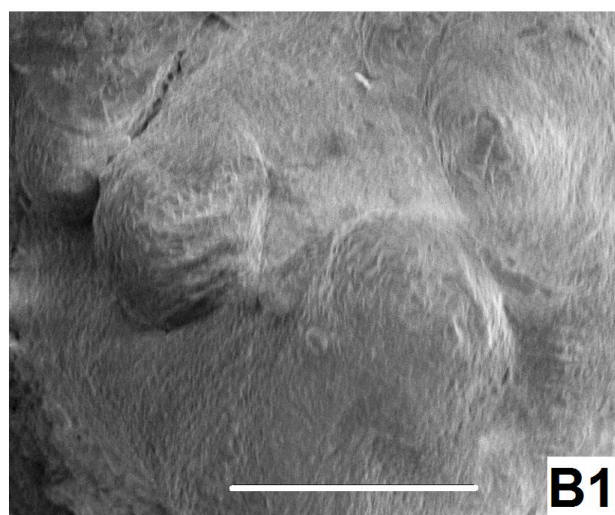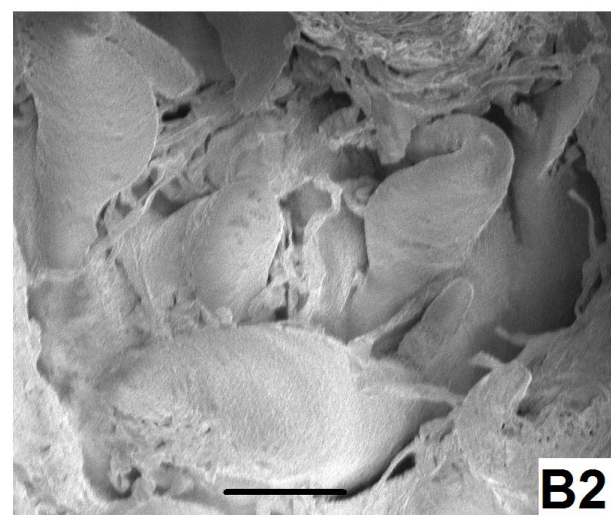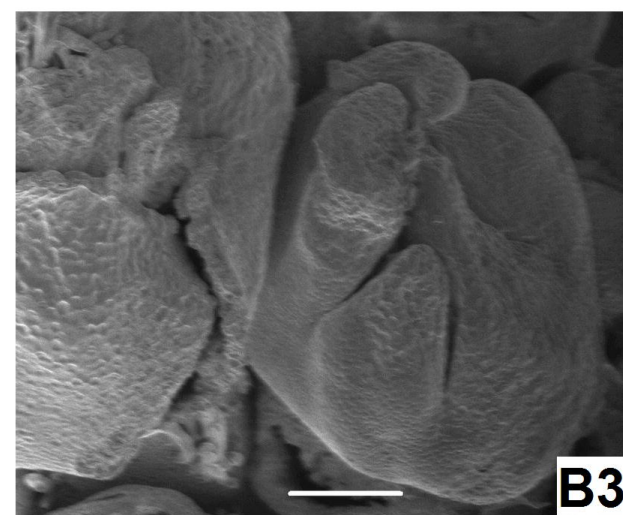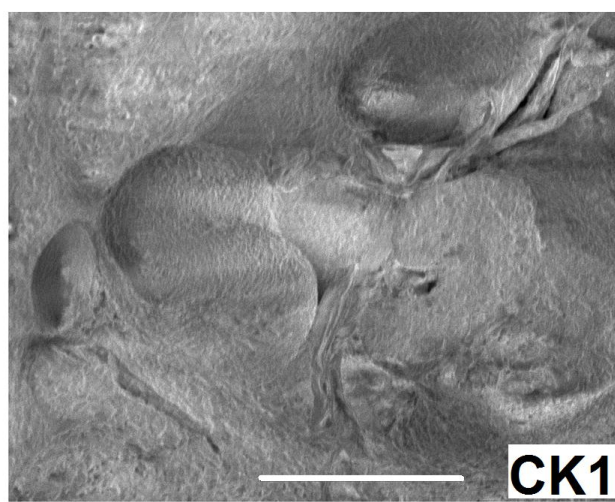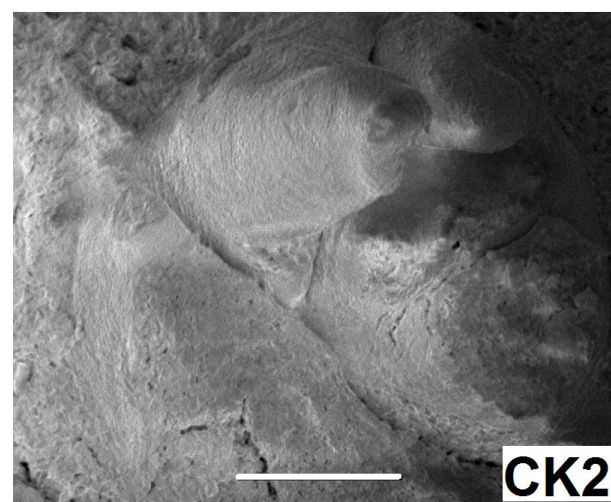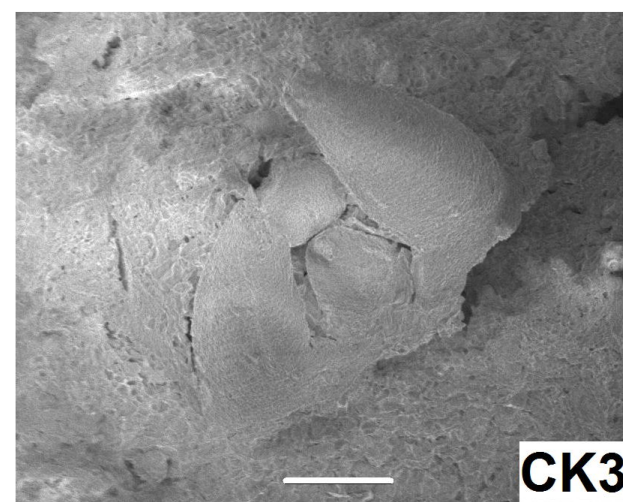**b**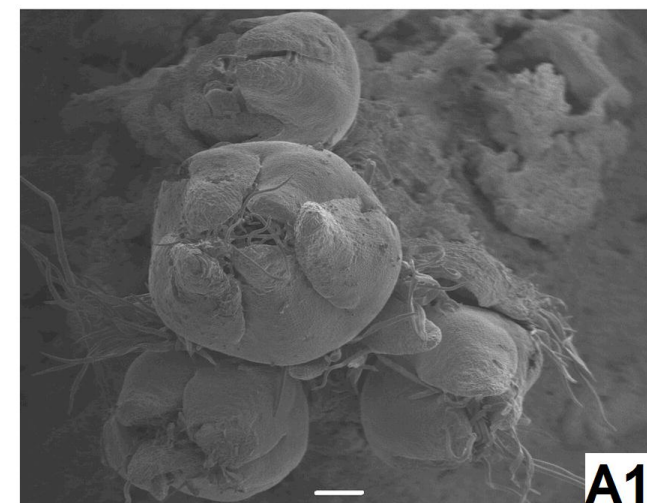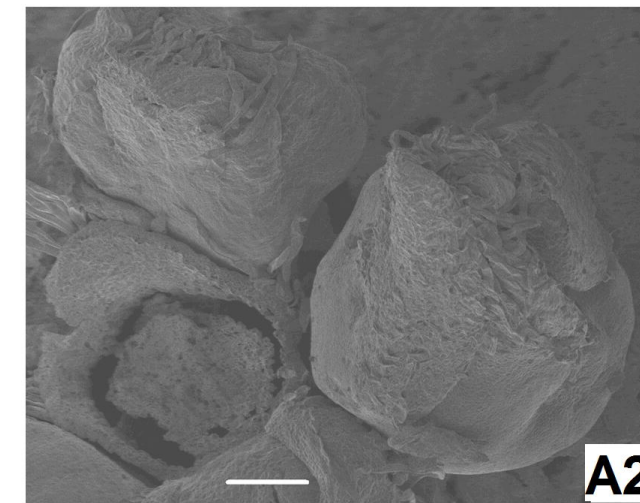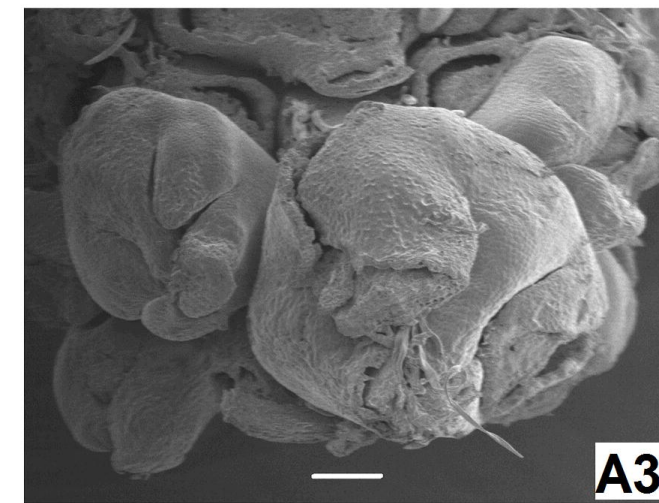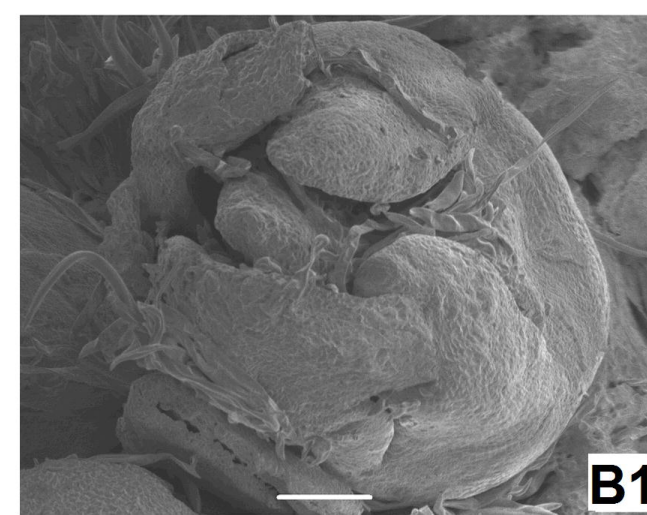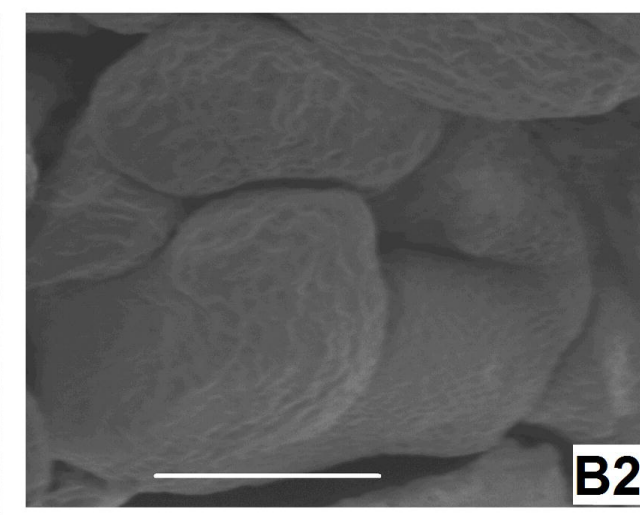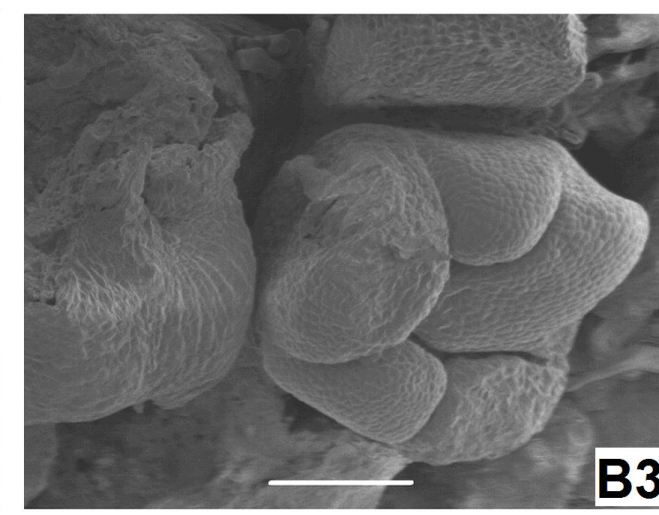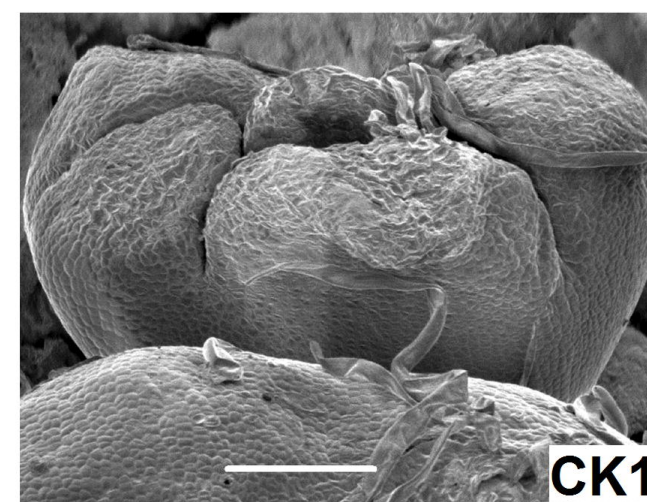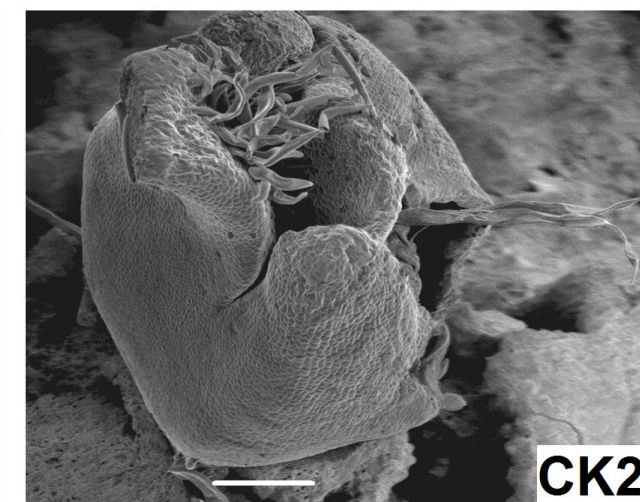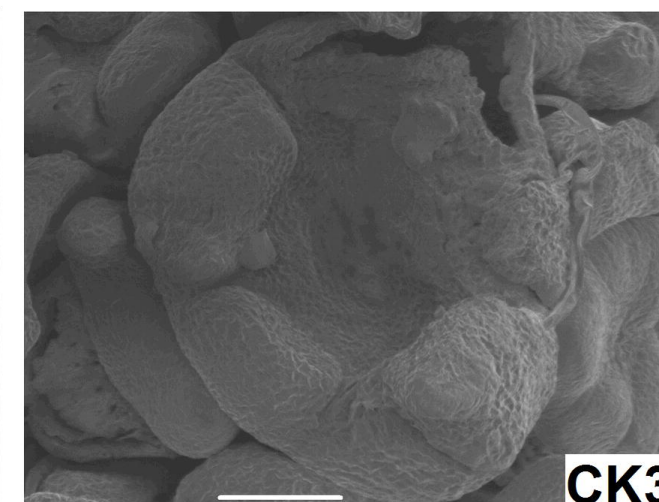

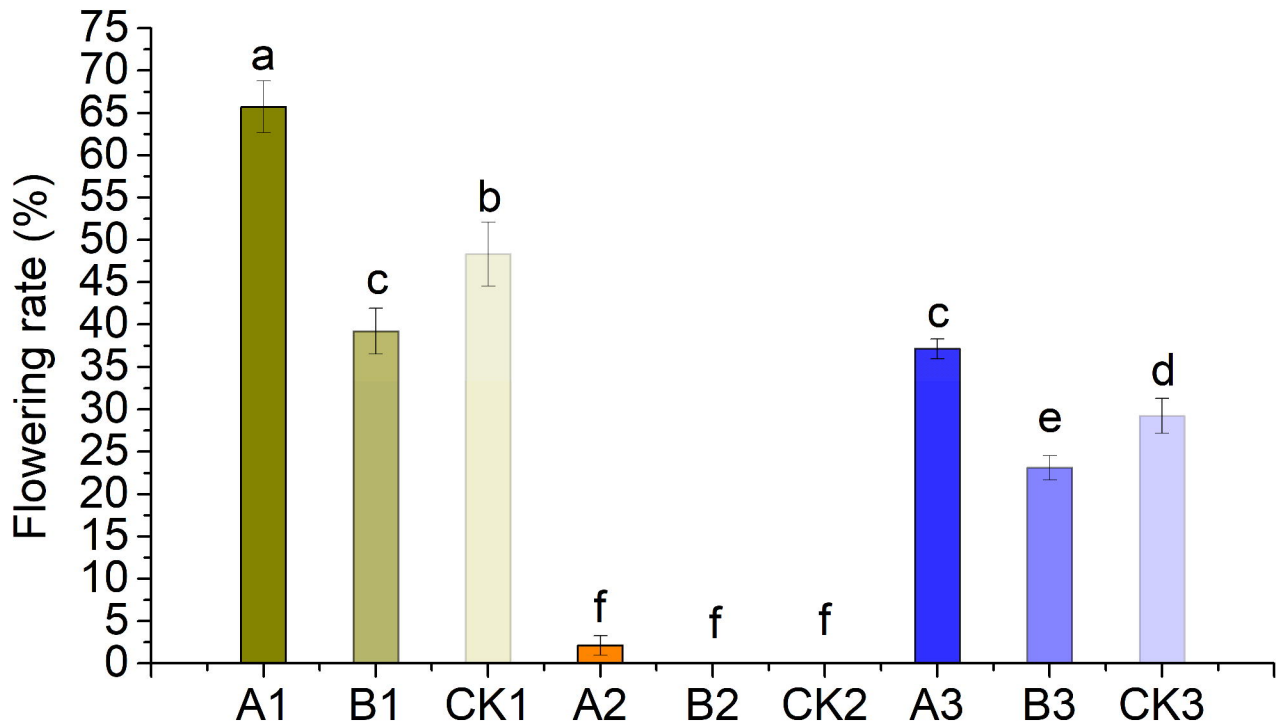

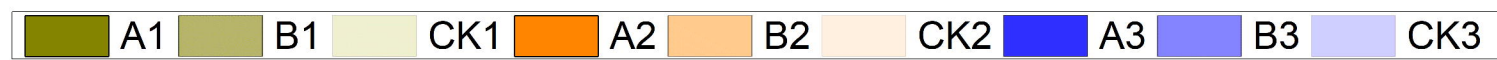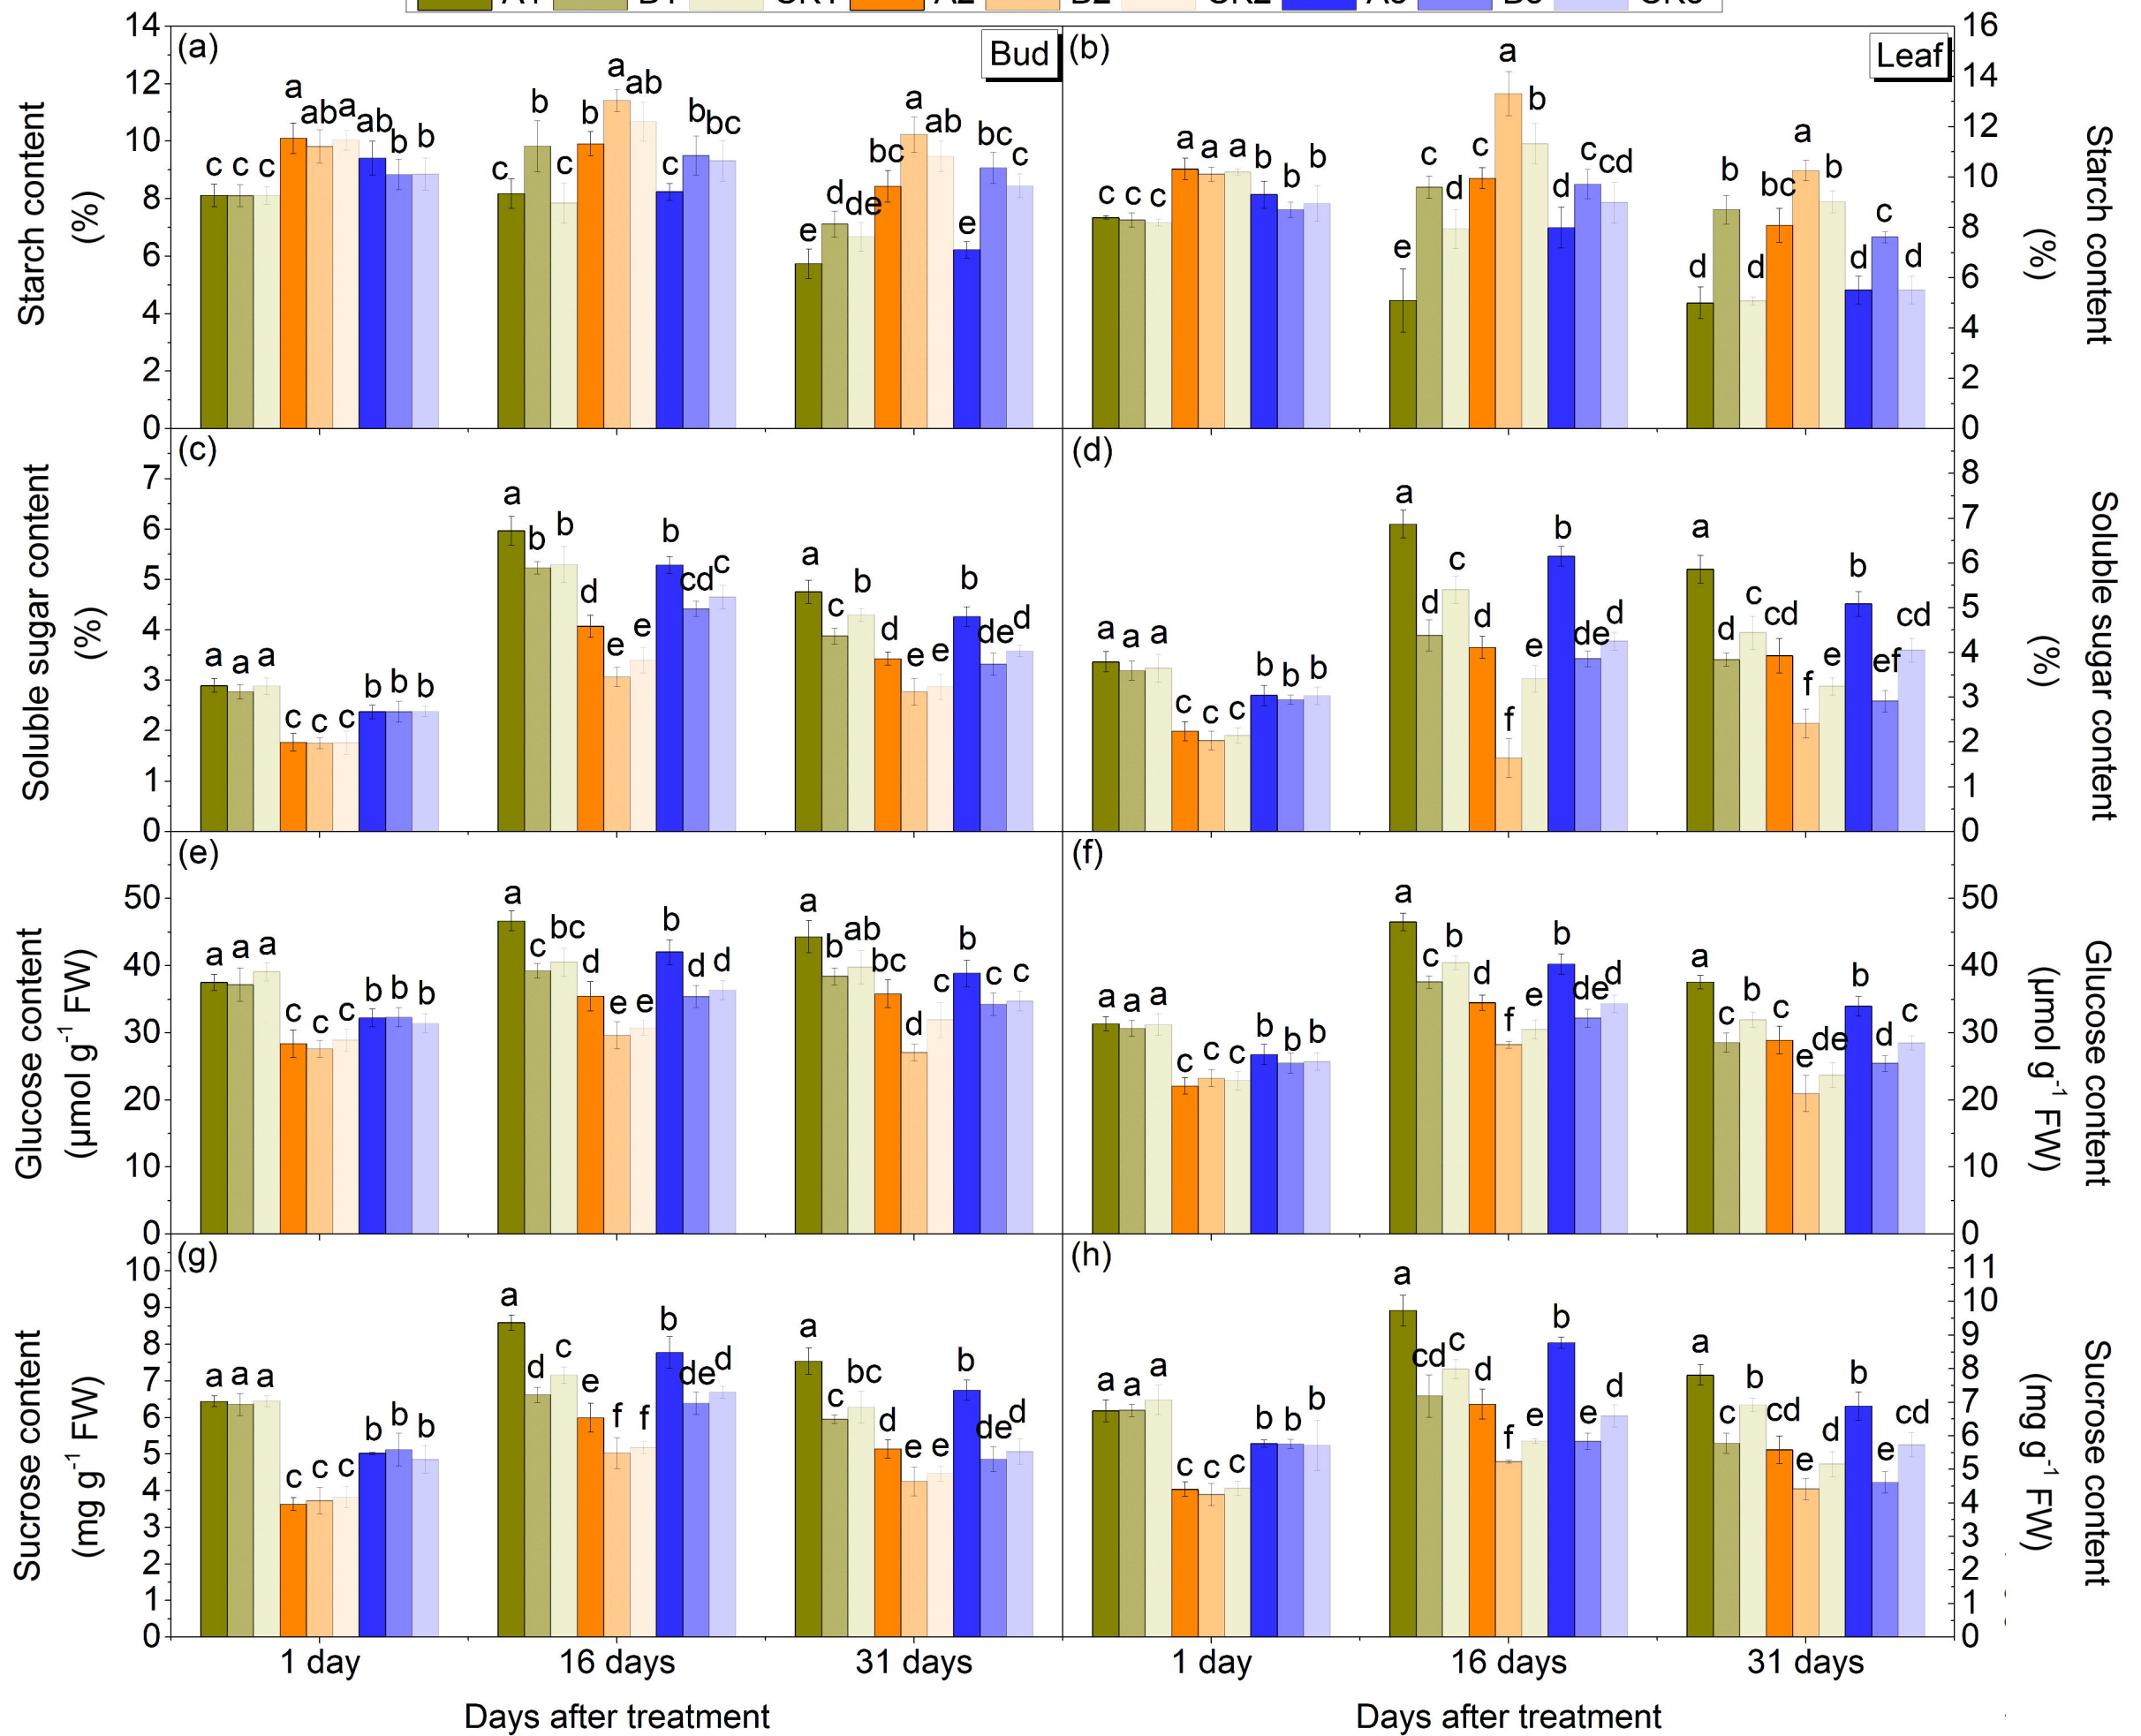

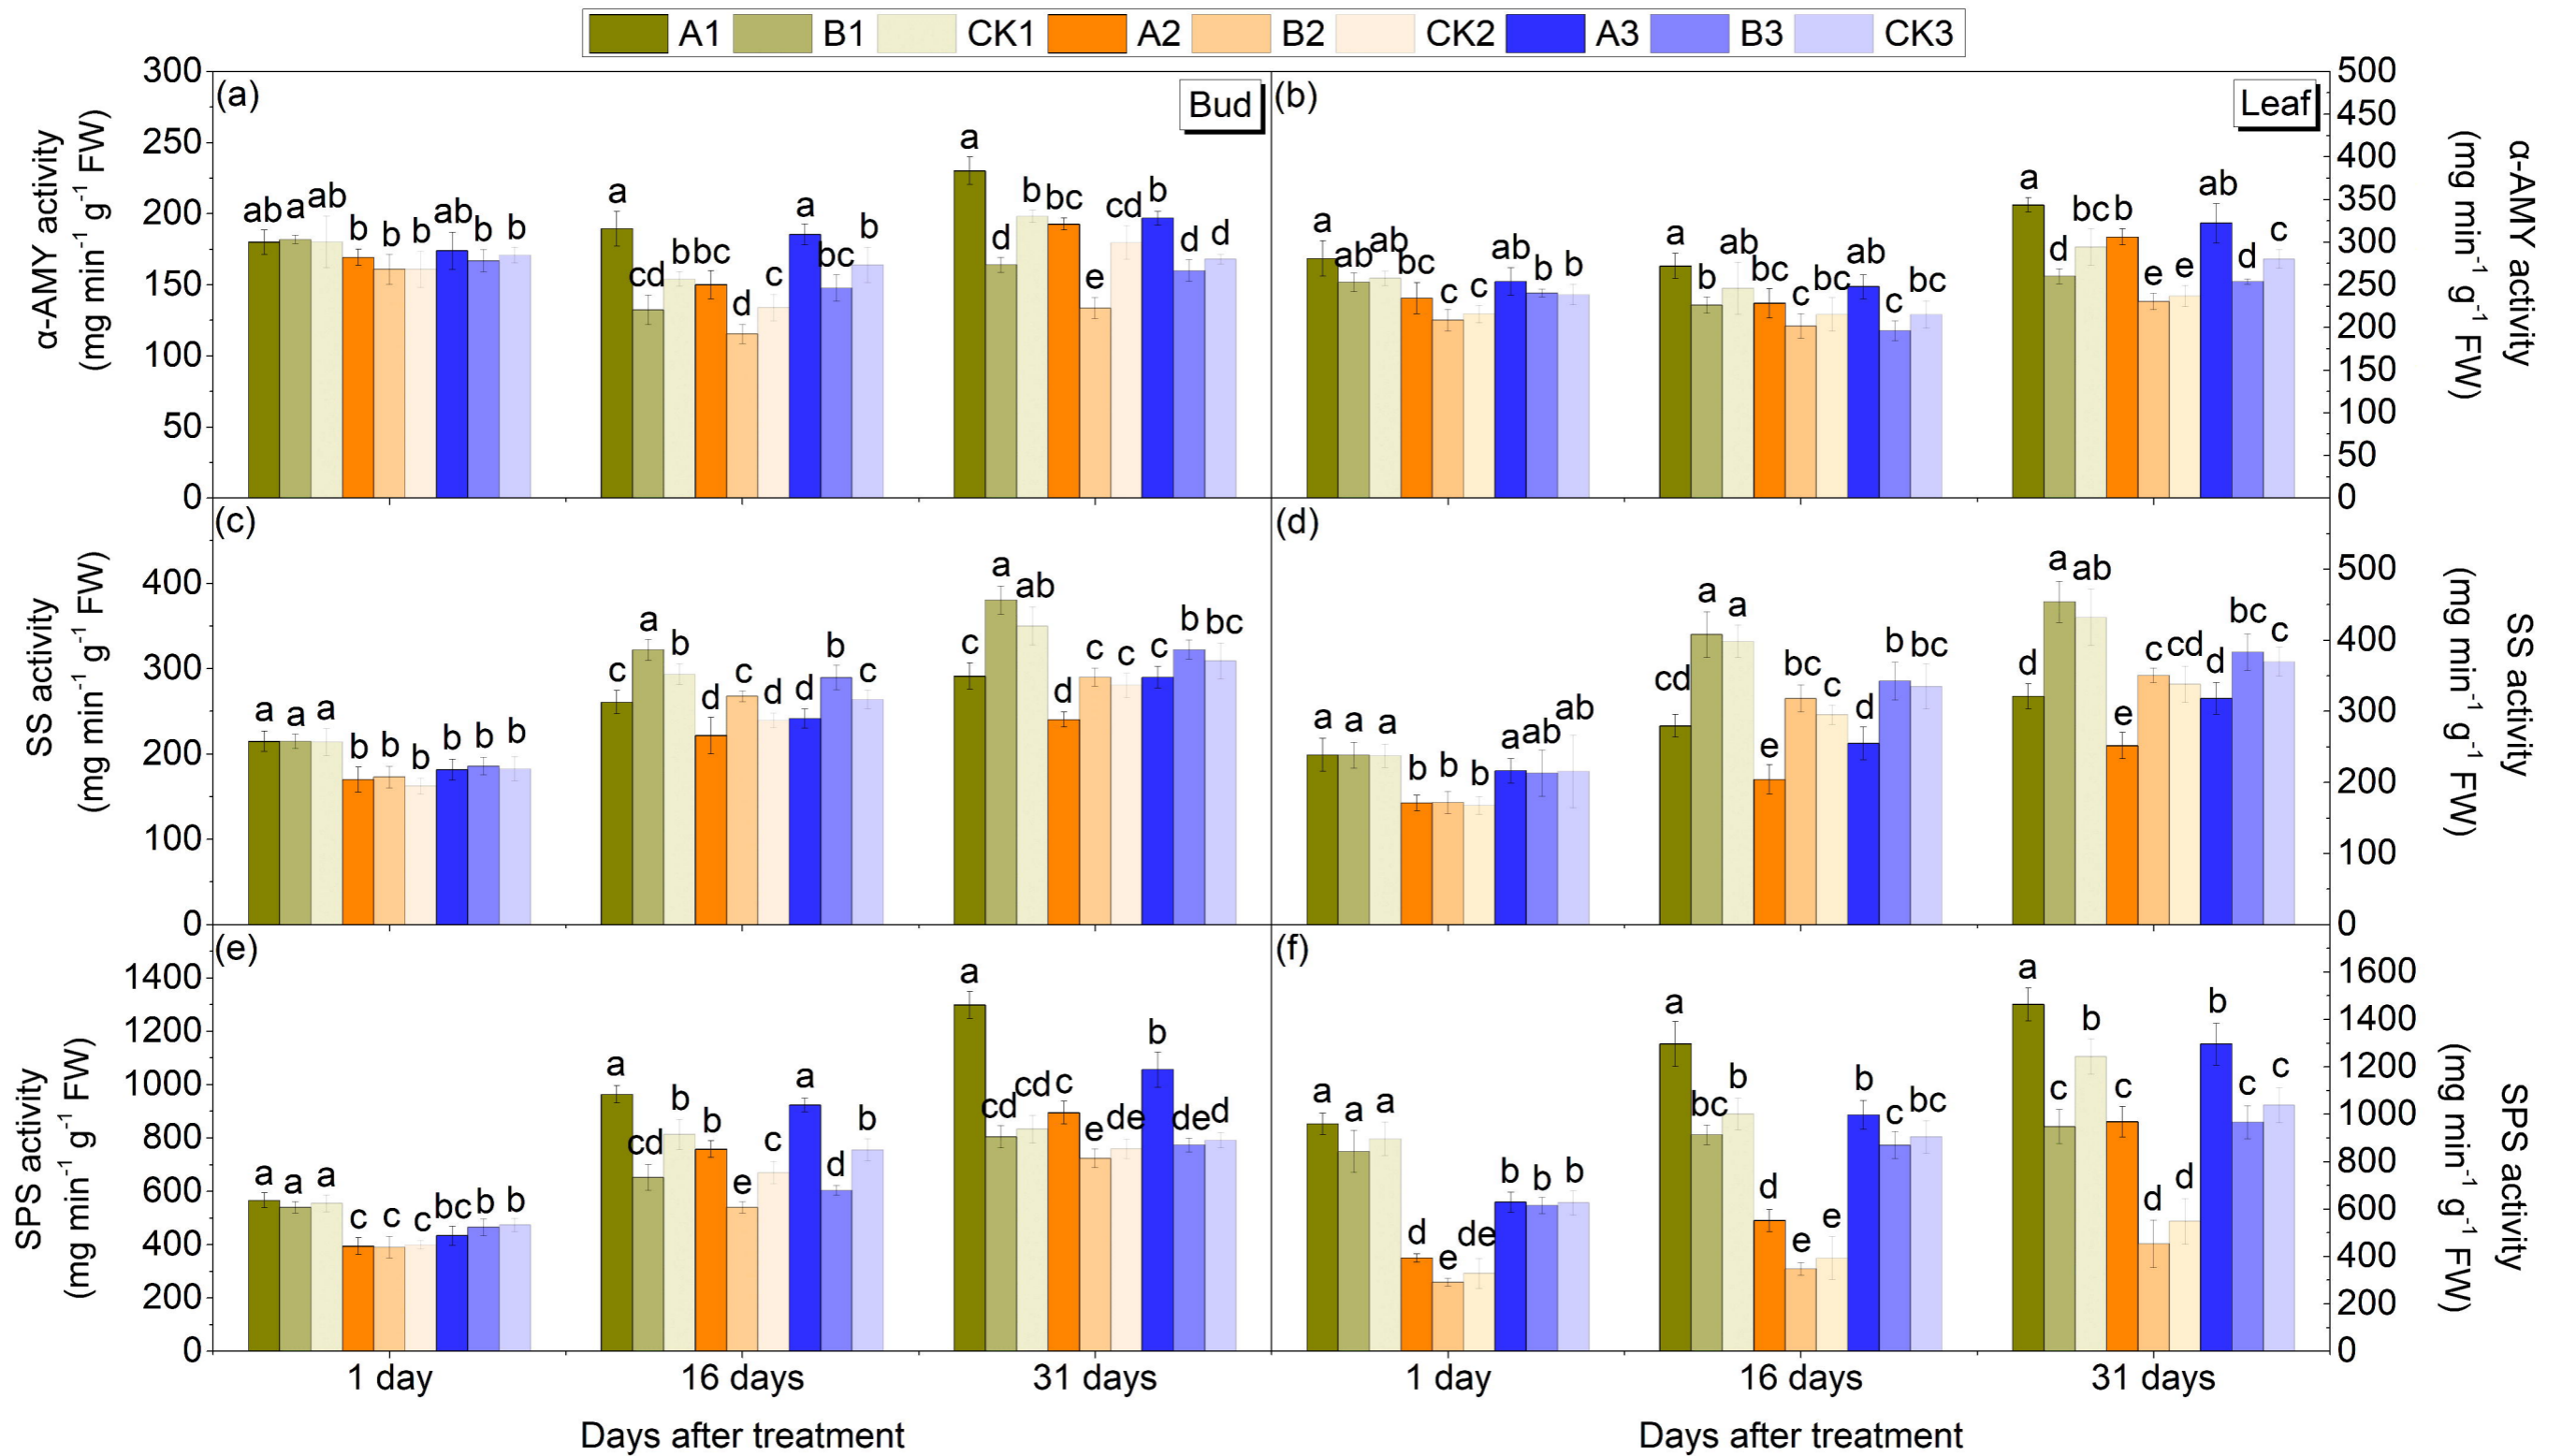

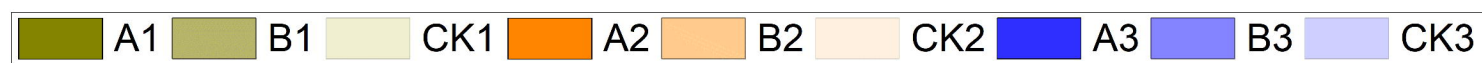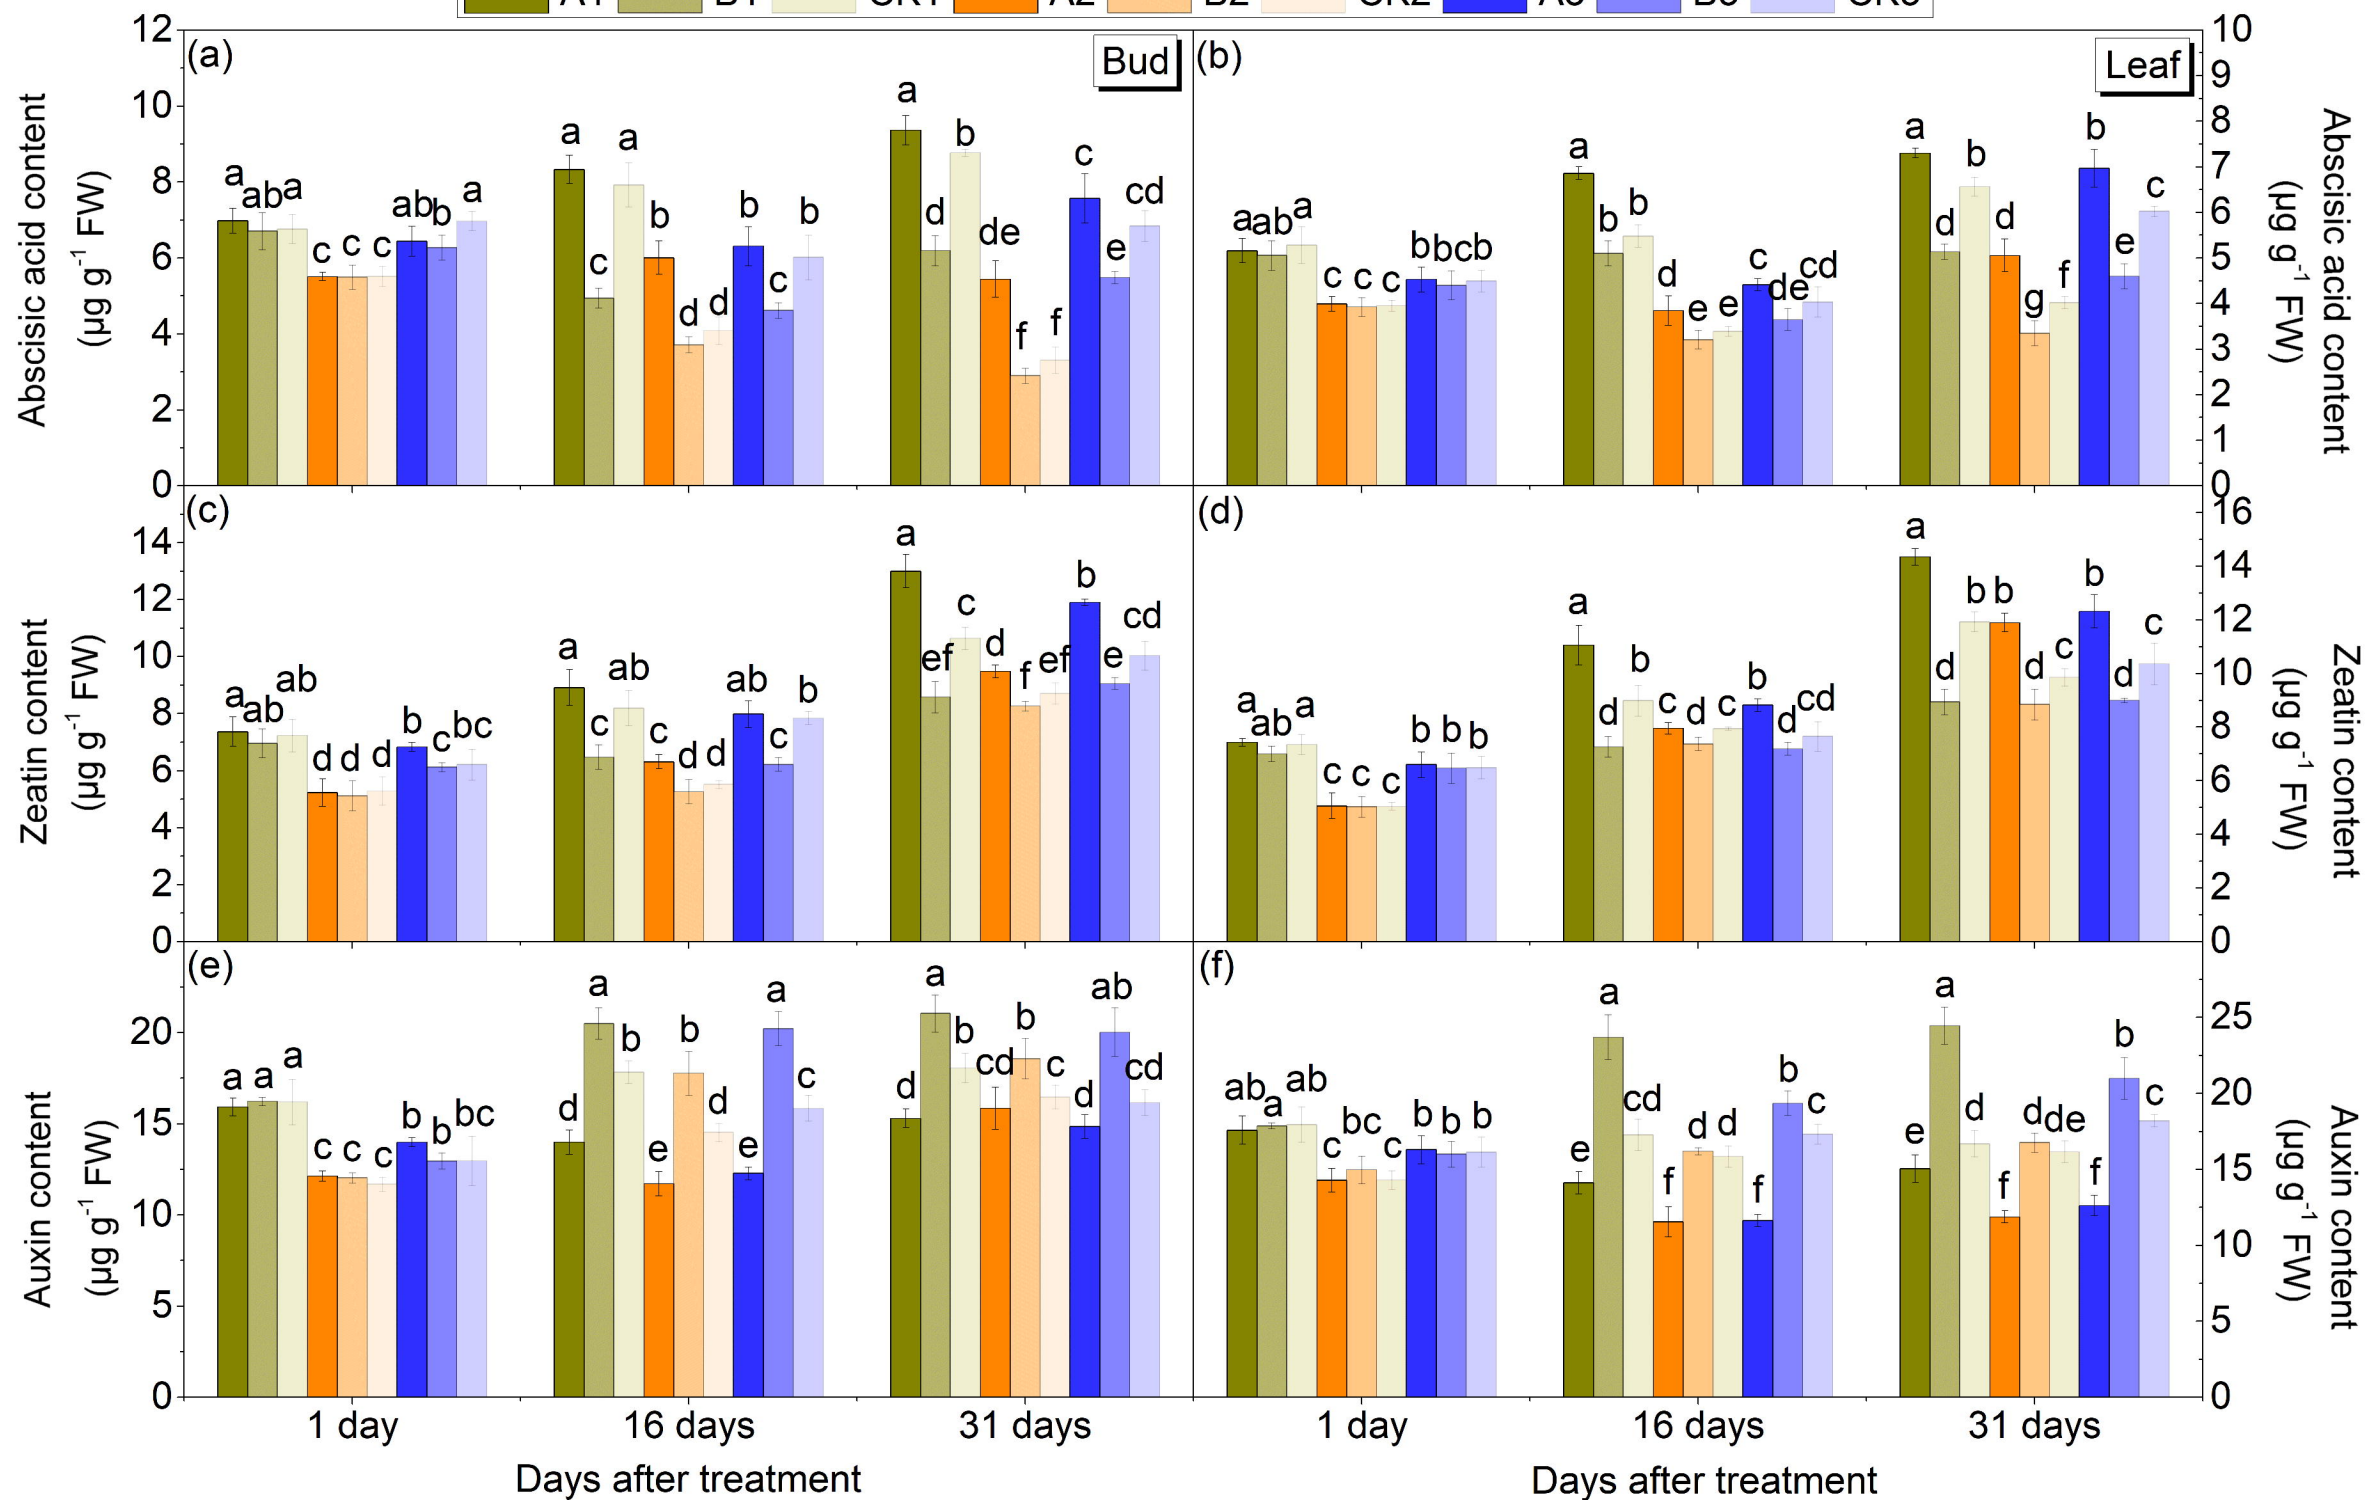

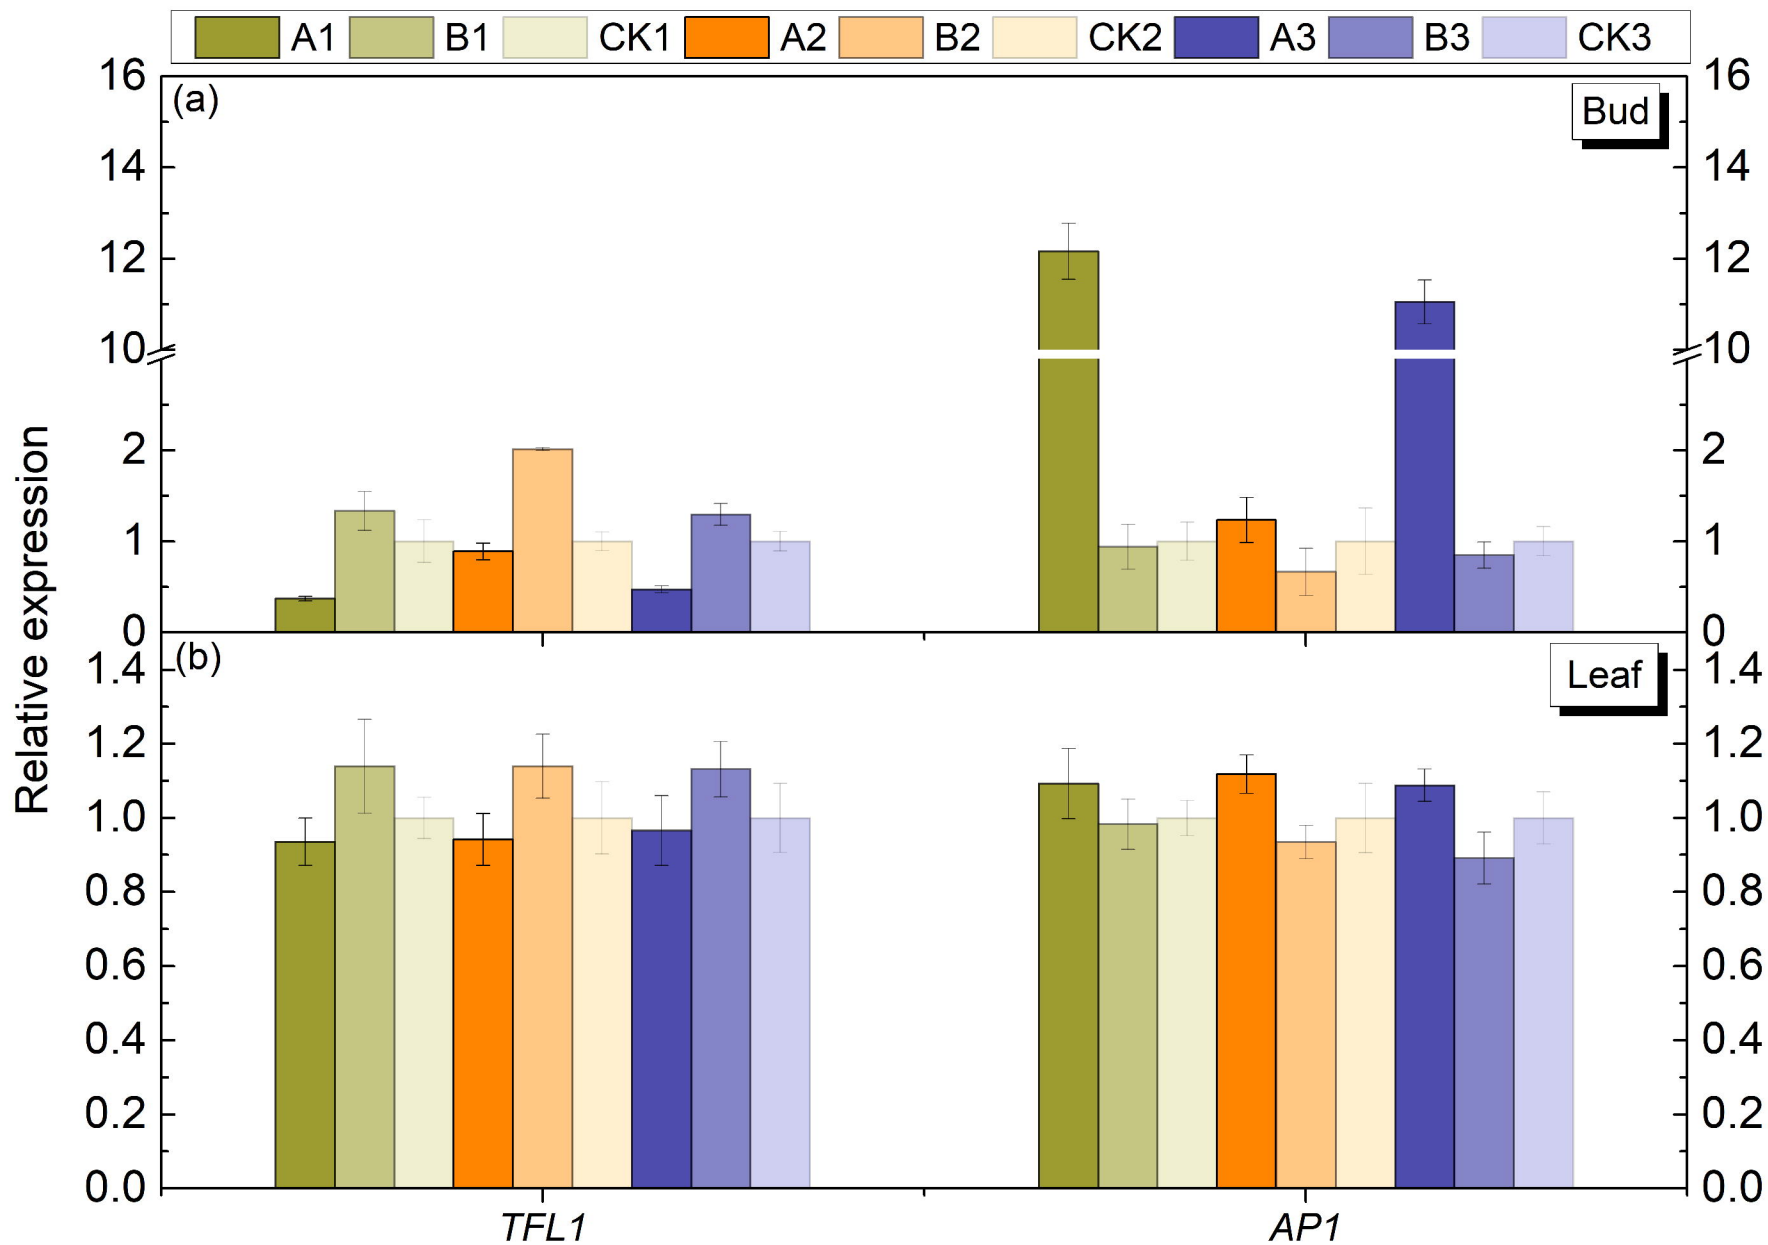

Source: https://www.biorxiv.org/content/10.1101/281303v1.full.pdf
